# Supplementary material
Source: Royal Society of Chemistry journal article supplement (doi:10.1039/d5ya00361j)
Supplement: d5ya00361j1.pdf [file d5ya00361j1.pdf]

Supplementary Information for:

## Sodium Tetrphenylborate: A Fluorine-Free Electrolyte Salt for Sodium-Ion Batteries

Darren M. C. Ould,<sup>\*a,b</sup> James M. Courtney,<sup>a</sup> Kyle G. Pearce,<sup>c</sup> Daniel J. Curtis,<sup>a</sup> Marcin W. Orzech,<sup>a</sup>  
Sajad Kiani,<sup>a</sup> Brent de Boode,<sup>d</sup> and Serena Margadonna<sup>\*a</sup>

[a] Department of Chemical Engineering, Faculty of Science and Engineering, Swansea University, Swansea SA1 8EN, U.K.

[b] The Faraday Institution, Quad One, Harwell Science and Innovation Campus, Didcot, OX11 0RA, U.K.

[c] Department of Chemistry, University of Bath, Claverton Down, Bath, BA2 7AY, U.K.

[d] Batri Ltd., Unit 6a Bridgend Business Centre, Bennett Street, Bridgend, CF31 3SH, U.K.

### Contents

|                                                            |    |
|------------------------------------------------------------|----|
| <b>S1 Thermal measurements.</b> .....                      | 2  |
| <b>S2 Bulk conductivity.</b> .....                         | 2  |
| <b>S3 Viscosity.</b> .....                                 | 3  |
| <b>S4 DOSY NMR spectroscopy.</b> .....                     | 4  |
| <b>S5 Cyclic voltammetry.</b> .....                        | 5  |
| <b>S6 Scanning electron microscopy (SEM) images.</b> ..... | 8  |
| <b>S7 Sodium-ion cycling.</b> .....                        | 9  |
| <b>S8 NMR Spectroscopy</b> .....                           | 13 |
| <b>S9 References.</b> .....                                | 30 |

## S1 Thermal measurements.

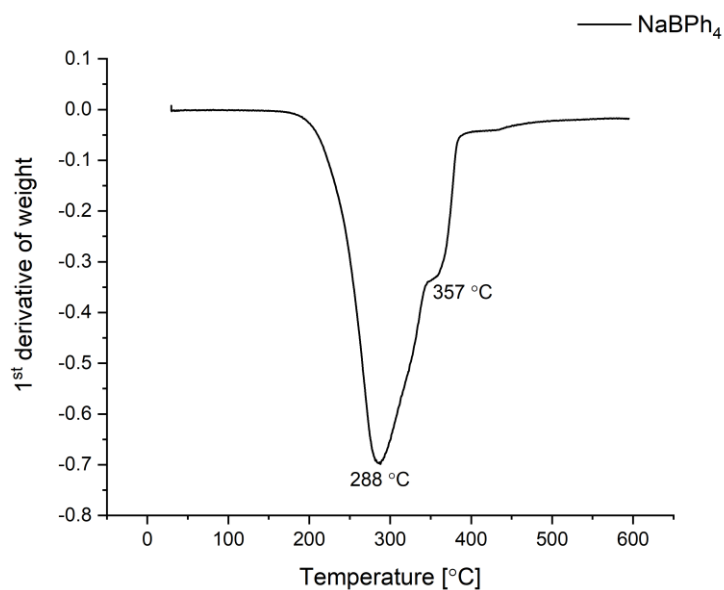

**Figure S1** 1<sup>st</sup> derivative of the Weight vs. Temperature plot for NaBPh<sub>4</sub>, showing the inflection point temperature.

## S2 Bulk conductivity.

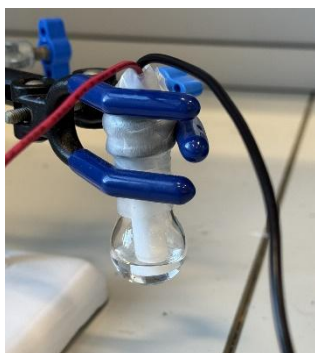

**Figure S2** Two-electrode platinum cell designed to perform ionic conductivity measurements.

The cell constant was determined by measuring the impedance spectra of 0.01 M, 0.1 M and 1 M aqueous solutions of KCl, which have known ionic conductivity values, at 25 °C, 35 °C and 45 °C. The high frequency region on the impedance spectra were fitted using the equivalence circuit  $R_1 + (R_2 + Q_2) \times Q_1$  (Figure S3). An average of the cell constant values gave the value  $10.2 \pm 0.3 \text{ cm}^{-1}$ .

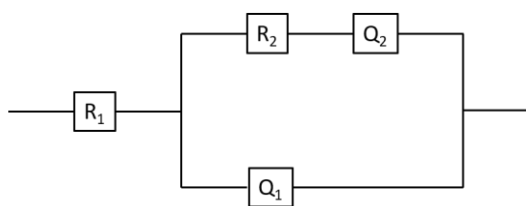

**Figure S3** Equivalence circuit used to determine the cell constant.

### S3 Viscosity.

**Table S1:** Newtonian viscosity measurements of EC:DEC (1:1 v/v) solvent and different electrolyte concentrations of NaBPh<sub>4</sub> in EC:DEC.

| Concentration (M)   | Newtonian Viscosity (mPa.s) |       |       |       |                    |
|---------------------|-----------------------------|-------|-------|-------|--------------------|
|                     | Run 1                       | Run 2 | Run 3 | Mean  | Standard deviation |
| Neat EC:DEC solvent | 1.51                        | 1.50  | 1.42  | 1.48  | 0.05               |
| 0.1                 | 1.80                        | 1.79  | 1.69  | 1.76  | 0.06               |
| 0.25                | 2.15                        | 2.37  | 2.15  | 2.22  | 0.12               |
| 0.5                 | 3.65                        | 3.56  | 3.80  | 3.67  | 0.12               |
| 1.0                 | 10.46                       | 9.47  | 10.37 | 10.10 | 0.55               |
| 1.5                 | 36.45                       | 36.75 | 36.65 | 36.62 | 0.15               |

#### S4 DOSY NMR spectroscopy.

Solution NMR experiments were conducted on a Bruker 9.4 T magnet ( $\nu_0(^1\text{H}) = 400 \text{ MHz}$ ) equipped with an Avance IIIHD console. A 5 mm BBO probe was used for all experiments. The Bruker dstebpgp3s convection corrected pulse sequence was used, with a diffusion delay of  $\Delta = 60 \text{ ms}$  and a gradient pulse length of  $\delta = 2 \text{ ms}$ . Spectra were obtained over an 8 step gradient range from 10–90%. Spectra were processed using Topspin and Dynamics Center.

**Table S2:** Diffusion coefficients of ethylene carbonate (EC), diethyl carbonate (DEC) and  $\text{BPh}_4^-$  anion. Measured by  $^1\text{H}$  DOSY NMR spectroscopy. Diffusion coefficients in units of  $10^{-10} \text{ m}^2 \text{ s}^{-1}$ .

| Concentration (M) | $D_{\text{EC}}$ | $D_{\text{DEC (ethyl)}}$ | $D_{\text{DEC (methyl)}}$ | $D_{\text{BPh}_4^-}$ | $D_{\text{EC}} - D_{\text{BPh}_4^-}$ |
|-------------------|-----------------|--------------------------|---------------------------|----------------------|--------------------------------------|
| 0.1               | 7.89            | 6.92                     | 7.13                      | 2.95                 | 4.94                                 |
| 0.25              | 6.27            | 6.17                     | 6.01                      | 2.28                 | 3.99                                 |
| 0.5               | 4.03            | 3.80                     | 3.94                      | 1.47                 | 2.56                                 |
| 1.0               | 1.78            | 1.72                     | 1.88                      | 0.68                 | 1.10                                 |
| 1.5               | 0.70            | 0.81                     | 0.72                      | 0.26                 | 0.44                                 |

To determine the percentage of free EC solvent molecules (i.e. not coordinated to  $\text{Na}^+$ ) in the  $\text{NaBPh}_4$  electrolyte solutions, we assume 4 EC solvent molecules are coordinated to one  $\text{Na}^+$  cation at all electrolyte concentrations. This is because  $\text{Na}^+$  favours a five- or six-coordination geometry and cyclic carbonates preferentially coordinate to  $\text{Na}^+$  over linear carbonates, thus in the coordination shell of  $\text{Na}^+$  the ratio of EC to DEC is greater than 1:1.<sup>1</sup> From this assumption, the percentage of free EC solvent molecules decreases from 90% in the 0.1 M  $\text{NaBPh}_4$  electrolyte, 87% in the 0.25 M  $\text{NaBPh}_4$  electrolyte, 73% in the 0.5 M  $\text{NaBPh}_4$  electrolyte, 47% in the 1 M  $\text{NaBPh}_4$  electrolyte and 20% in the 1.5 M  $\text{NaBPh}_4$  electrolyte.

If the amount of coordinated EC solvent molecules is lower and we assume that 3 EC solvent molecules are coordinated to the  $\text{Na}^+$  cation at all electrolyte concentrations, then the percentage of free EC solvent molecules (not coordinated to  $\text{Na}^+$ ) decreases from 96% in the 0.1 M  $\text{NaBPh}_4$  electrolyte to 90% in the 0.25 M  $\text{NaBPh}_4$  electrolyte, 80% in the 0.5 M  $\text{NaBPh}_4$  electrolyte, 60% in the 1 M  $\text{NaBPh}_4$  sample and 40% in the 1.5 M  $\text{NaBPh}_4$  sample. A similar discussion to this investigating the percentage of free EC solvent molecules in  $\text{NaPF}_6$  in EC:DEC (1:1 v/v) electrolytes has previously been reported.<sup>2</sup>

## S5 Cyclic voltammetry.

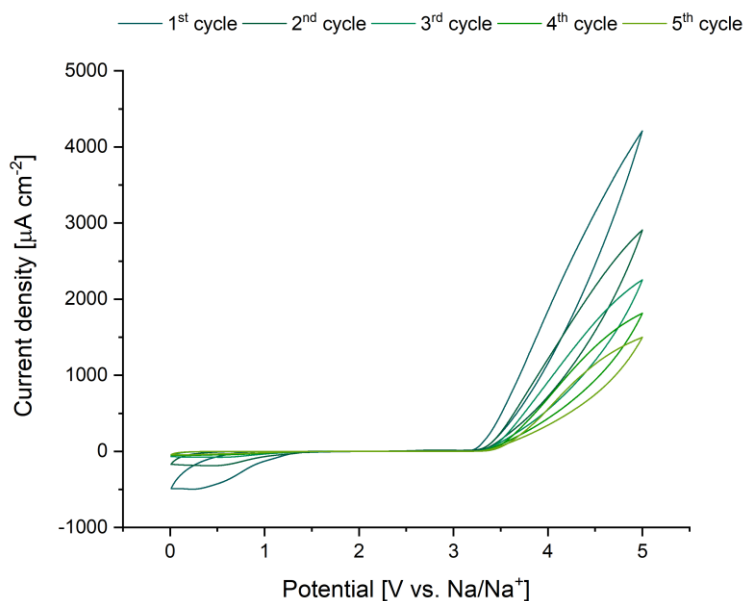

**Figure S4** Cyclic voltammogram of 0.5 M NaBPh<sub>4</sub> in EC:DEC (1:1 v/v). Working electrode is glassy carbon, counter electrode is platinum and the pseudo reference electrode is sodium. First five cycles, measured between 0.01 V and 5 V vs. Na/Na<sup>+</sup> at 10 mV s<sup>-1</sup>.

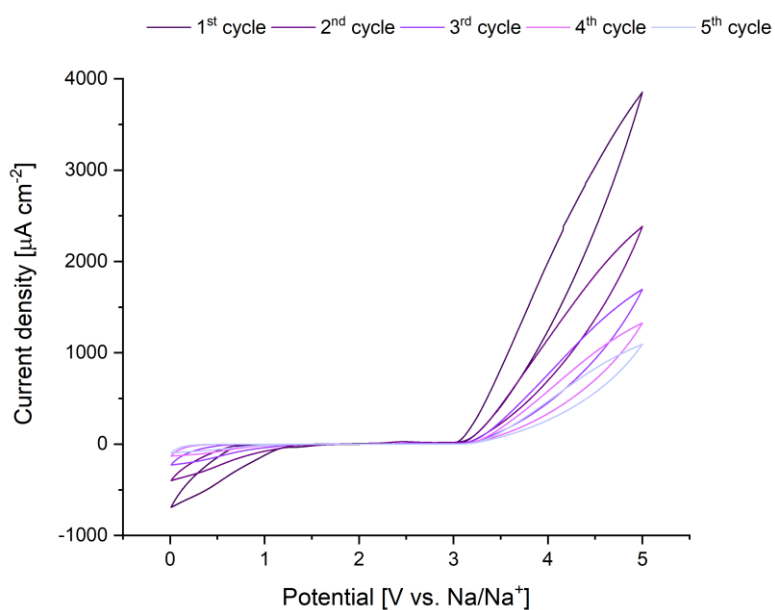

**Figure S5** Cyclic voltammogram of 1 M NaBPh<sub>4</sub> in EC:DEC (1:1 v/v). Working electrode is glassy carbon, counter electrode is platinum and the pseudo reference electrode is sodium. First five cycles, measured between 0.01 V and 5 V vs. Na/Na<sup>+</sup> at 10 mV s<sup>-1</sup>.

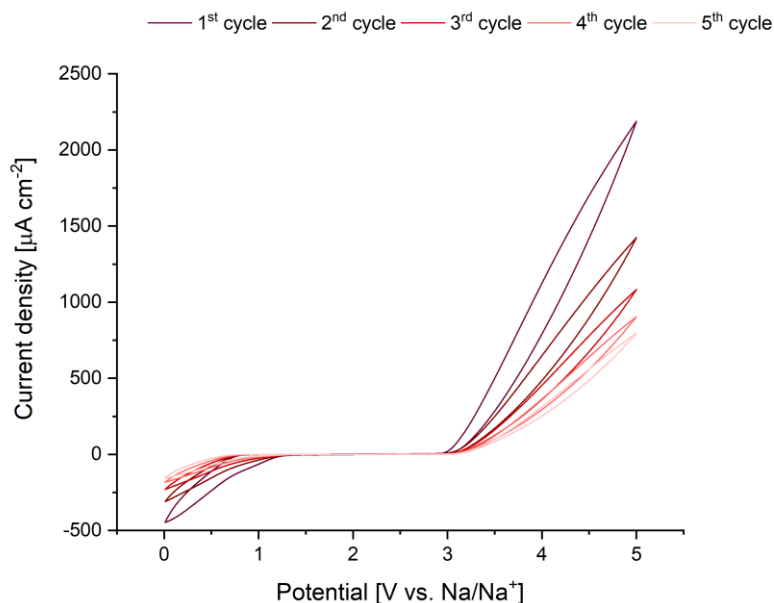

**Figure S6** Cyclic voltammogram of 1.5 M NaBPh<sub>4</sub> in EC:DEC (1:1 v/v). Working electrode is glassy carbon, counter electrode is platinum and the pseudo reference electrode is sodium. First five cycles, measured between 0.01 V and 5 V vs. Na/Na<sup>+</sup> at 10 mV s<sup>-1</sup>.

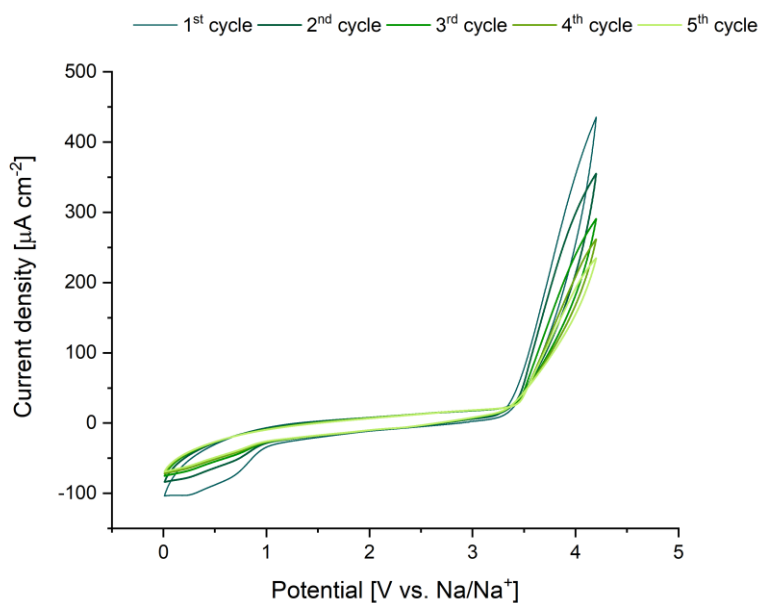

**Figure S7** Cyclic voltammogram of 0.5 M NaBPh<sub>4</sub> in EC:DEC (1:1 v/v). Working electrode is aluminium, counter electrode is platinum and the pseudo reference electrode is sodium. First five cycles, measured between 0.01 V and 4.2 V vs. Na/Na<sup>+</sup> at 5 mV s<sup>-1</sup>.

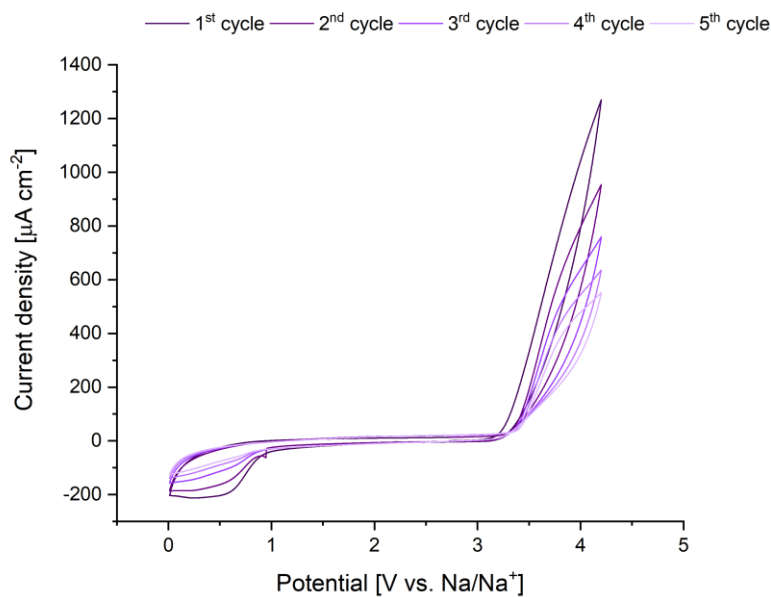

**Figure S8** Cyclic voltammogram of 1 M NaBPh<sub>4</sub> in EC:DEC (1:1 v/v). Working electrode is aluminium, counter electrode is platinum and the pseudo reference electrode is sodium. First five cycles, measured between 0.01 V and 4.2 V vs. Na/Na<sup>+</sup> at 5 mV s<sup>-1</sup>.

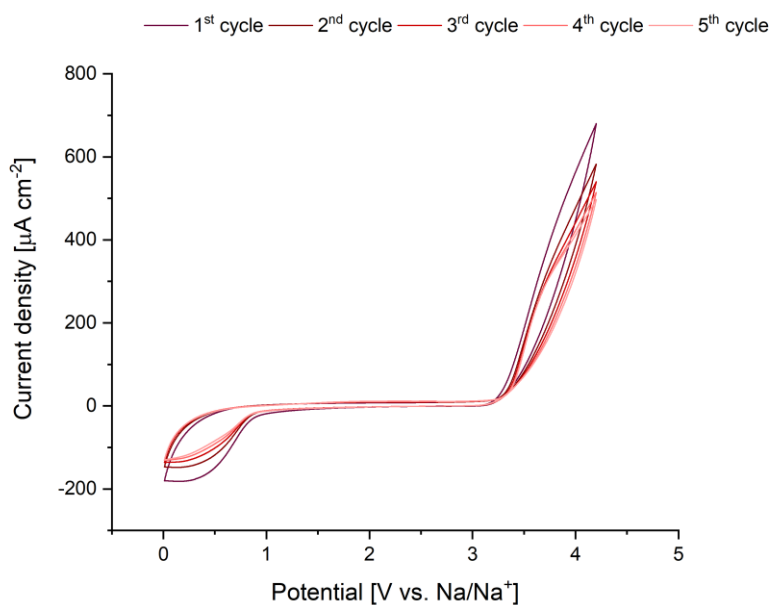

**Figure S9** Cyclic voltammogram of 1.5 M NaBPh<sub>4</sub> in EC:DEC (1:1 v/v). Working electrode is aluminium, counter electrode is platinum and the pseudo reference electrode is sodium. First five cycles, measured between 0.01 V and 4.2 V vs. Na/Na<sup>+</sup> at 5 mV s<sup>-1</sup>.

## S6 Scanning electron microscopy (SEM) images.

Electron microscopy was performed using a Hitachi TM3030Plus tabletop microscope with an Oxford Instruments EDS X-stream-2 and MicsF+. Images were captured using the TM3030 software version 01-05-02, with additional images captured and EDX spectra obtained and analysed with AztecOne Sp1 3.1 software.

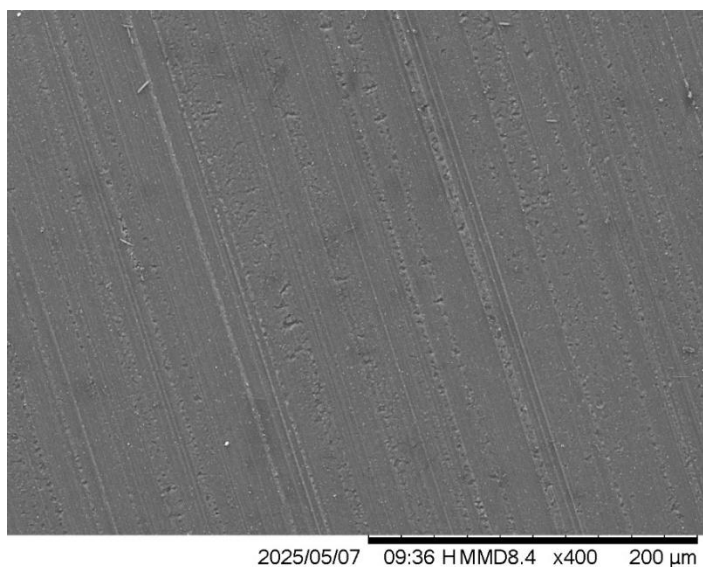

**Figure S10** Representative SEM surface image of the post-cycled aluminium working electrode that was used in the cyclic voltammetry experiment using 0.5 M NaBPh<sub>4</sub> measured between 0.01–4.2 V vs. Na/Na<sup>+</sup>.

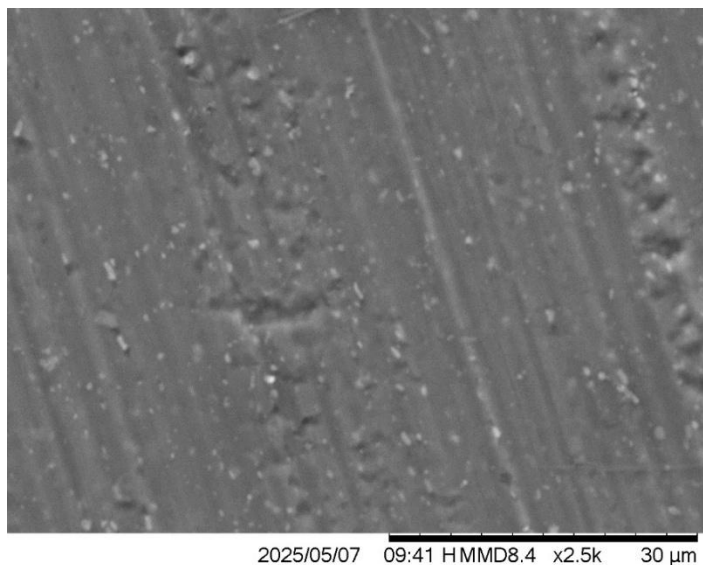

**Figure S11** Representative SEM surface image of the post-cycled aluminium working electrode that was used in the cyclic voltammetry experiment using 0.5 M NaBPh<sub>4</sub> measured between 0.01–4.2 V vs. Na/Na<sup>+</sup>.

## S7 Sodium-ion cycling.

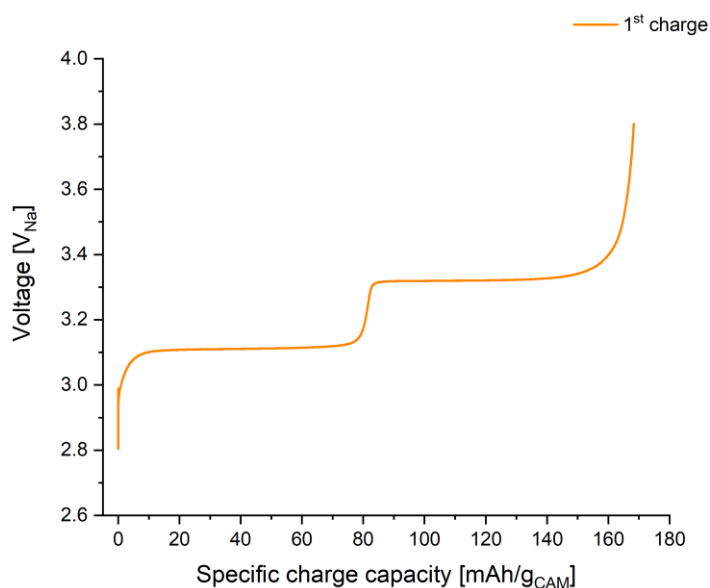

**Figure S12** Voltage vs specific charge capacity, normalised by the mass of cathode active material (CAM). Prussian white,  $\text{Na}_2\text{Fe}[\text{Fe}(\text{CN})_6]$ , cathode in a coin half-cell vs. sodium metal with 100  $\mu\text{l}$  of 1 M  $\text{NaPF}_6$  in EC:DEC (1:1 v/v) as electrolyte. The cell was charged at C/20 to 3.8 V<sub>Na</sub> at 21°C.

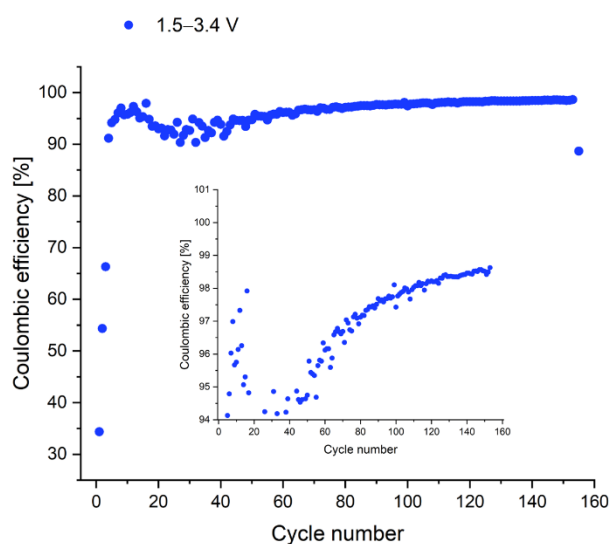

**Figure S13** Coulombic efficiency vs. cycle number using Prussian white cathode and hard-carbon anode, using cell voltage limits of 1.5 and 3.4 V. Electrolyte is 0.5 M  $\text{NaBPh}_4$  in EC:DEC (1:1 v/v). Cells cycled at 21°C.

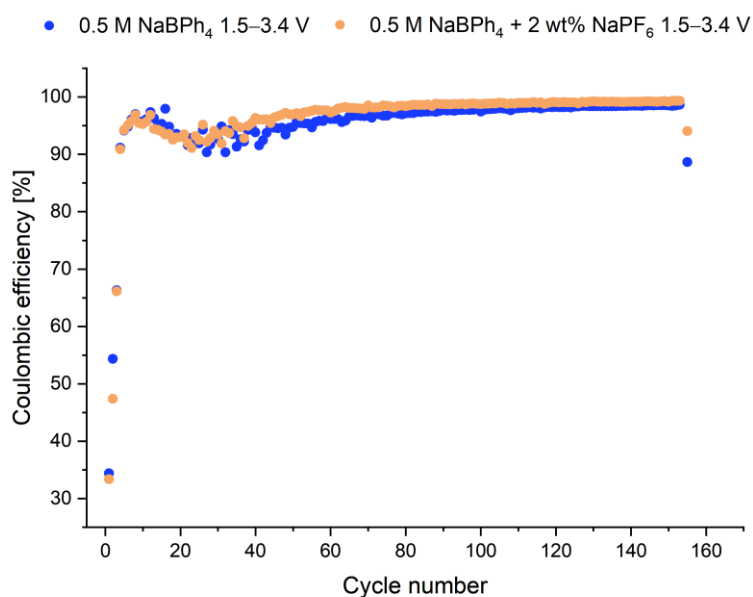

**Figure S14** Coulombic efficiency vs. cycle number using Prussian white cathode and hard-carbon anode, using cell voltage limits of 1.5 and 3.4 V. Electrolyte is 0.5 M NaBPh<sub>4</sub> (blue) and 0.5 M NaBPh<sub>4</sub> + 2 wt% NaPF<sub>6</sub> (orange) in EC:DEC (1:1 v/v). Cells cycled at 21°C.

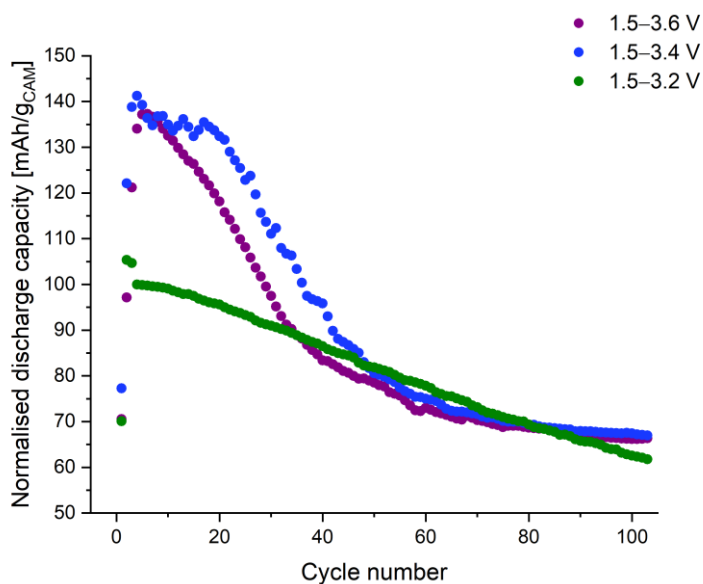

**Figure S15** Specific discharge capacity vs. cycle number using a Prussian white cathode and hard-carbon anode. Cell voltage limits of either 1.5–3.6 V (purple), 1.5–3.4 V (blue) or 1.5–3.2 V (green). The applied C-rates of C/20 and C/3 were calculated based on the theoretical capacity of 150 mAh g<sup>-1</sup> of the cathode. Electrolyte is 0.5 M NaBPh<sub>4</sub> in EC:DEC (1:1 v/v), cells cycled at 21°C.

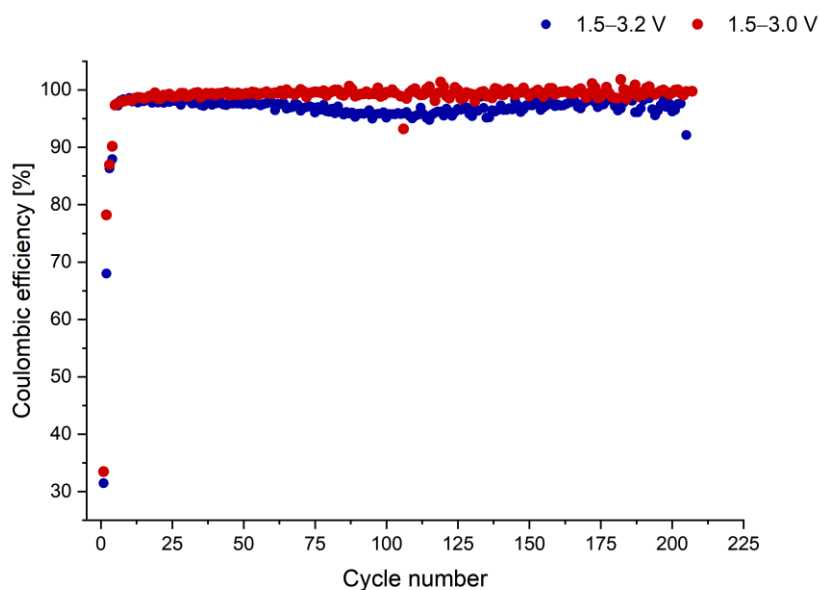

**Figure S16** Coulombic efficiency vs. cycle number using Prussian white cathode and hard-carbon anode, using cell voltage limits of either 1.5–3.2 V (blue) or 1.5–3.0 V (red) at rate C/5. Electrolyte is 0.5 M NaBPh<sub>4</sub> in EC:DEC (1:1 v/v). Cells cycled at 21°C.

#### Comparison with NaPF<sub>6</sub>

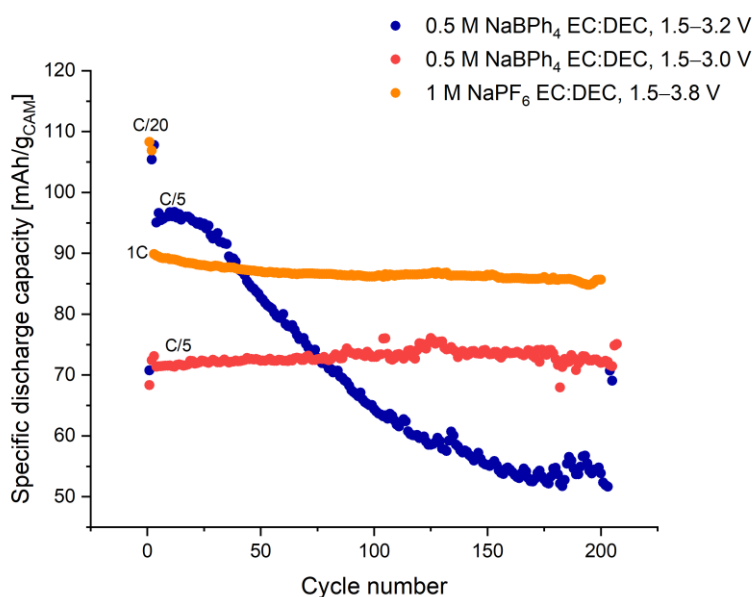

**Figure S17** Specific discharge capacity vs. cycle number using Prussian white cathode and hard-carbon anode. Electrolyte is either 0.5 M NaBPh<sub>4</sub> (blue and red) or 1 M NaPF<sub>6</sub> (orange) in EC:DEC (1:1 v/v), cycled at 21°C. The applied C-rates of C/20, 1C (NaPF<sub>6</sub>) and C/5 (NaBPh<sub>4</sub>) were calculated based on the expected capacity of 150 mAh g<sup>-1</sup> of the cathode, using cell voltage limits of 1.5–3.2 V (blue), 1.5 V–3.0 (red) or 1.5 V–3.8 (orange, NaPF<sub>6</sub>).

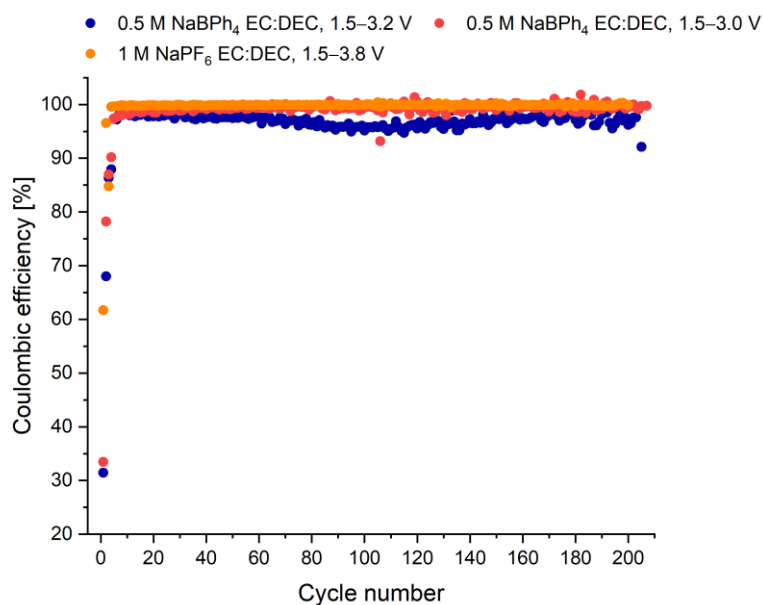

**Figure S18** Coulombic efficiency vs. cycle number using Prussian white cathode and hard-carbon anode. Electrolyte is either 0.5 M NaBPh<sub>4</sub> (blue and red) or 1 M NaPF<sub>6</sub> (orange) in EC:DEC (1:1 v/v), cycled at 21°C. Cell voltage limits of either 1.5–3.2 V (blue), 1.5–3.0 V (red) or 1.5–3.8 V (orange, NaPF<sub>6</sub>). The applied C-rates of C/20, 1C (NaPF<sub>6</sub>) and C/5 (NaBPh<sub>4</sub>) were calculated based on the expected capacity of 150 mAh g<sup>-1</sup> of the cathode.

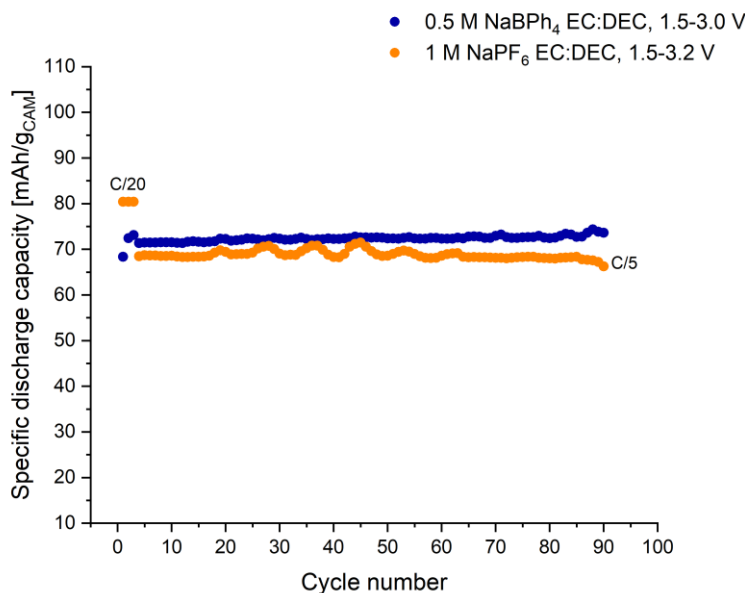

**Figure S19** Specific discharge capacity vs. cycle number using Prussian white cathode and hard-carbon anode. Electrolyte is either 0.5 M NaBPh<sub>4</sub> (blue) or 1 M NaPF<sub>6</sub> (orange) in EC:DEC (1:1 v/v), cycled at 21°C. The applied C-rates of C/20, and C/5 were calculated based on the expected capacity of 150 mAh g<sup>-1</sup> of the cathode, using cell voltage limits of 1.5–3.2 V (orange, NaPF<sub>6</sub>) or 1.5 V–3.0 (blue, NaBPh<sub>4</sub>).

# S8 NMR Spectroscopy

Figure S20  $^1\text{H}$  NMR (400 MHz, neat, 295 K) spectrum of pristine 0.1 M NaBPh<sub>4</sub> in EC:DEC (1:1 v/v).

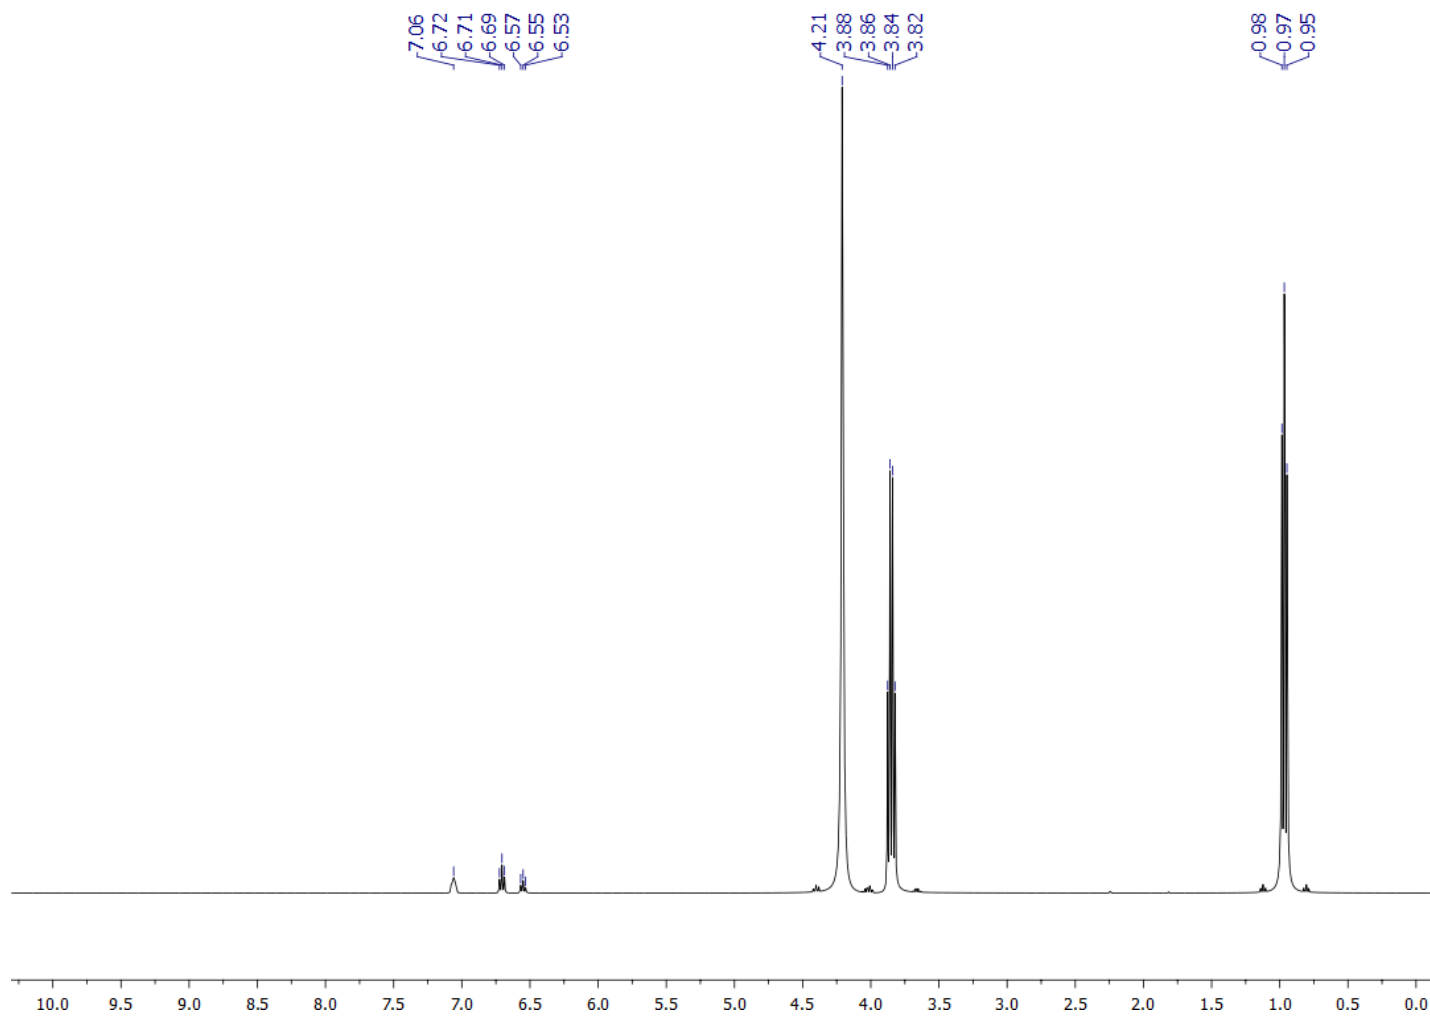

**Figure S21**  $^{11}\text{B}$  NMR (160 MHz,  $\text{CDCl}_3$ , 295 K) spectrum of pristine 0.1 M  $\text{NaBPh}_4$  in EC:DEC (1:1 v/v).

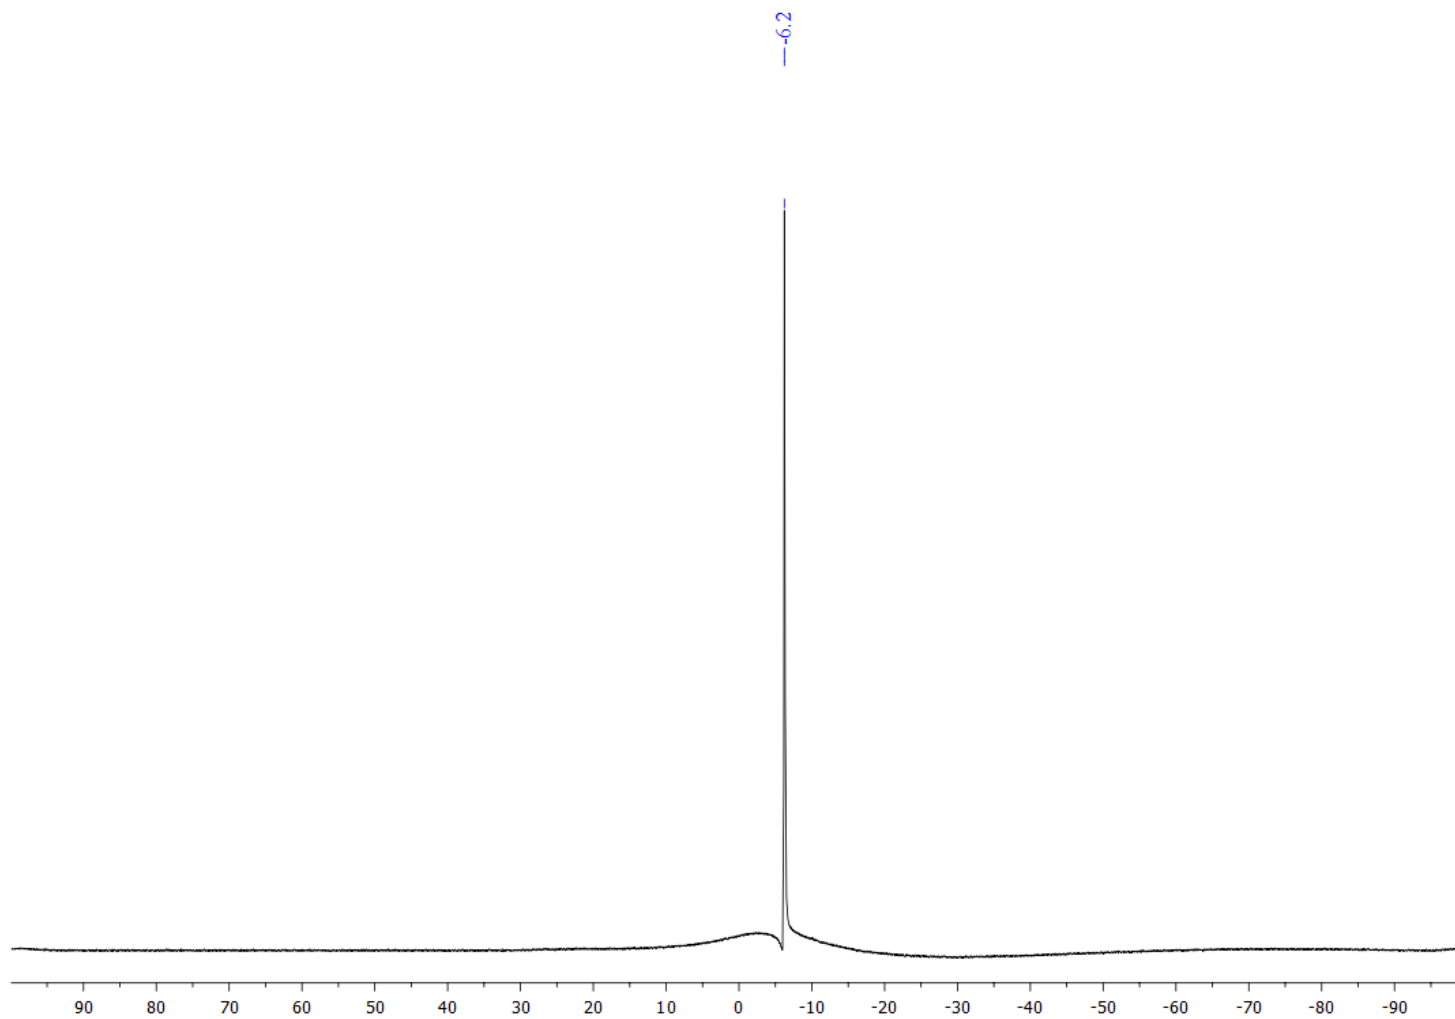

**Figure S22**  $^1\text{H}$  NMR (400 MHz, neat, 295 K) spectrum of pristine 0.25 M  $\text{NaBPh}_4$  in EC:DEC (1:1 v/v).

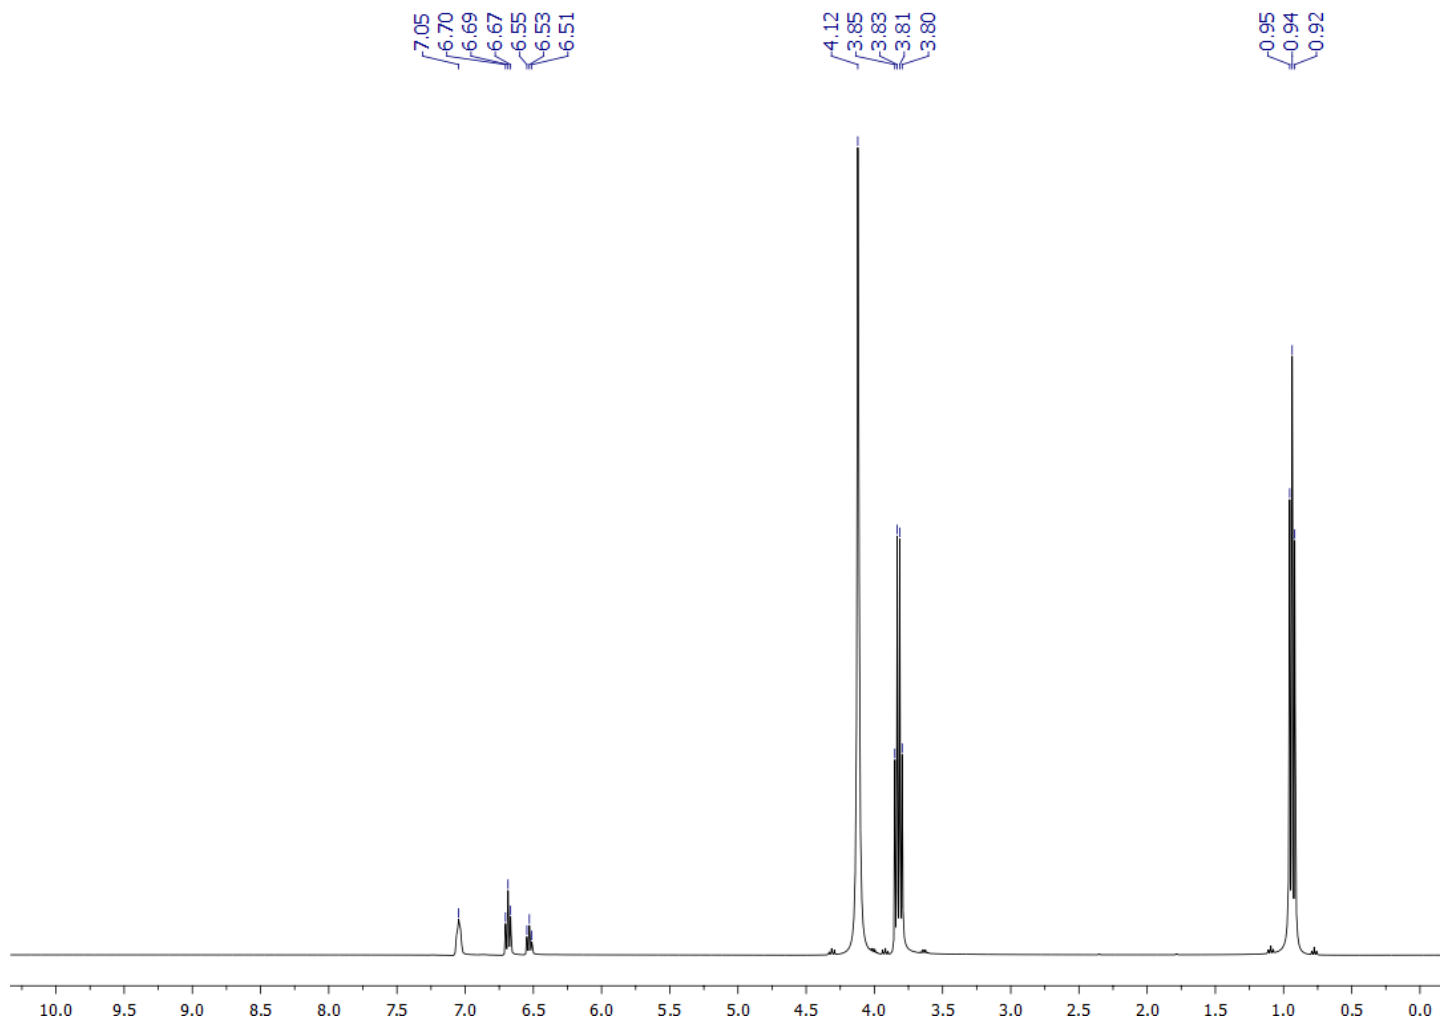

**Figure S23**  $^{11}\text{B}$  NMR (160 MHz,  $\text{CDCl}_3$ , 295 K) spectrum of pristine 0.25 M  $\text{NaBPh}_4$  in EC:DEC (1:1 v/v).

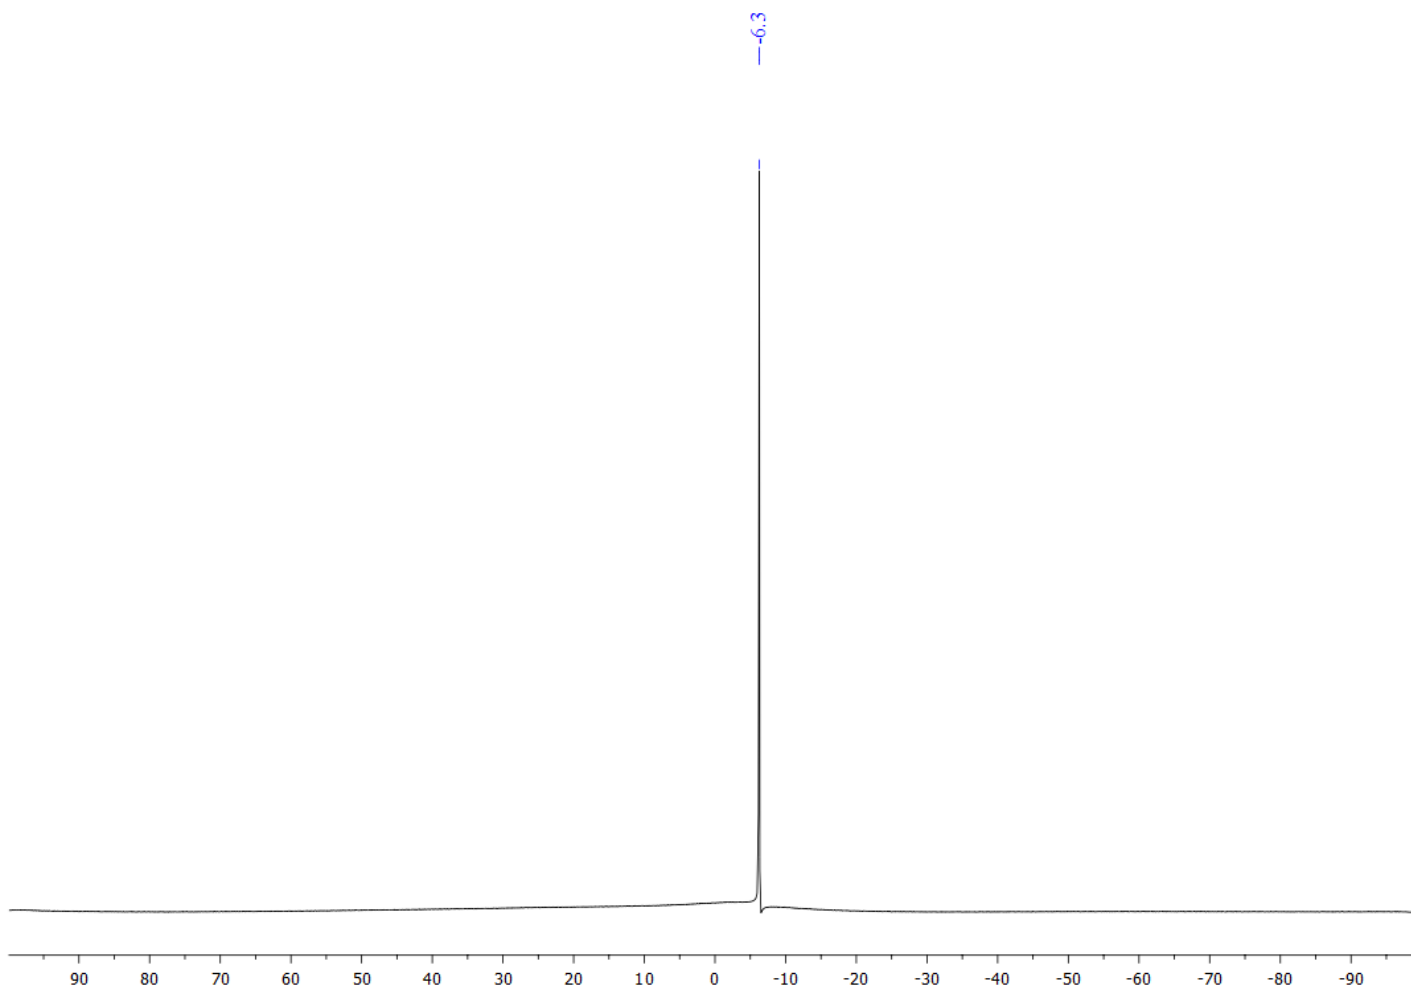

**Figure S24**  $^1\text{H}$  NMR (400 MHz, neat, 295 K) spectrum of pristine 0.5 M  $\text{NaBPh}_4$  in EC:DEC (1:1 v/v).

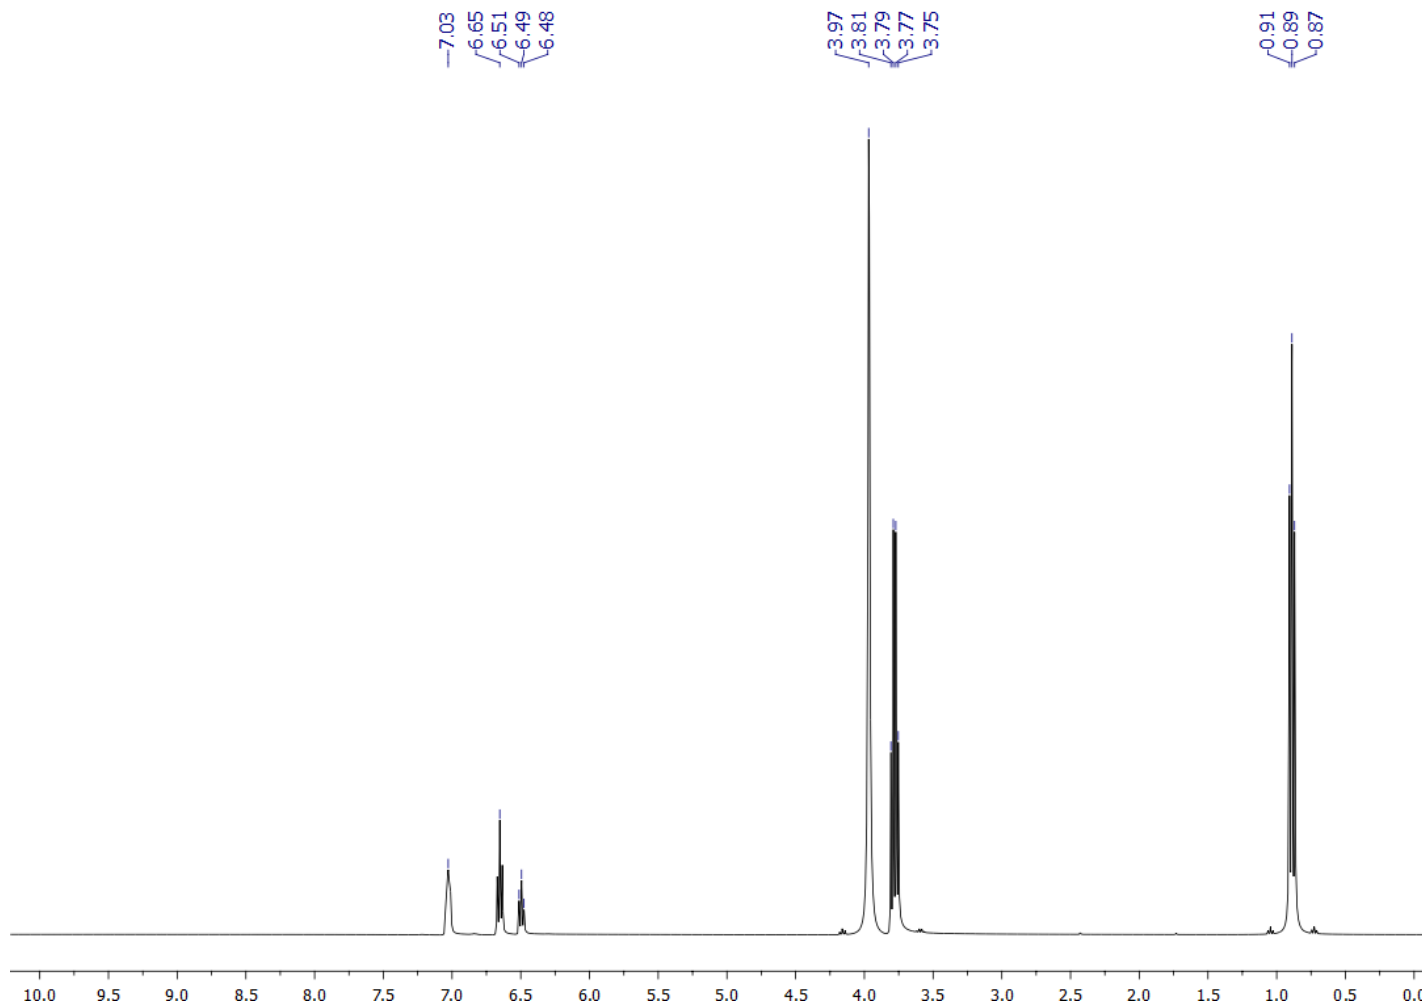

**Figure S25**  $^{11}\text{B}$  NMR (160 MHz,  $\text{CDCl}_3$ , 295 K) spectrum of pristine 0.5 M  $\text{NaBPh}_4$  in EC:DEC (1:1 v/v).

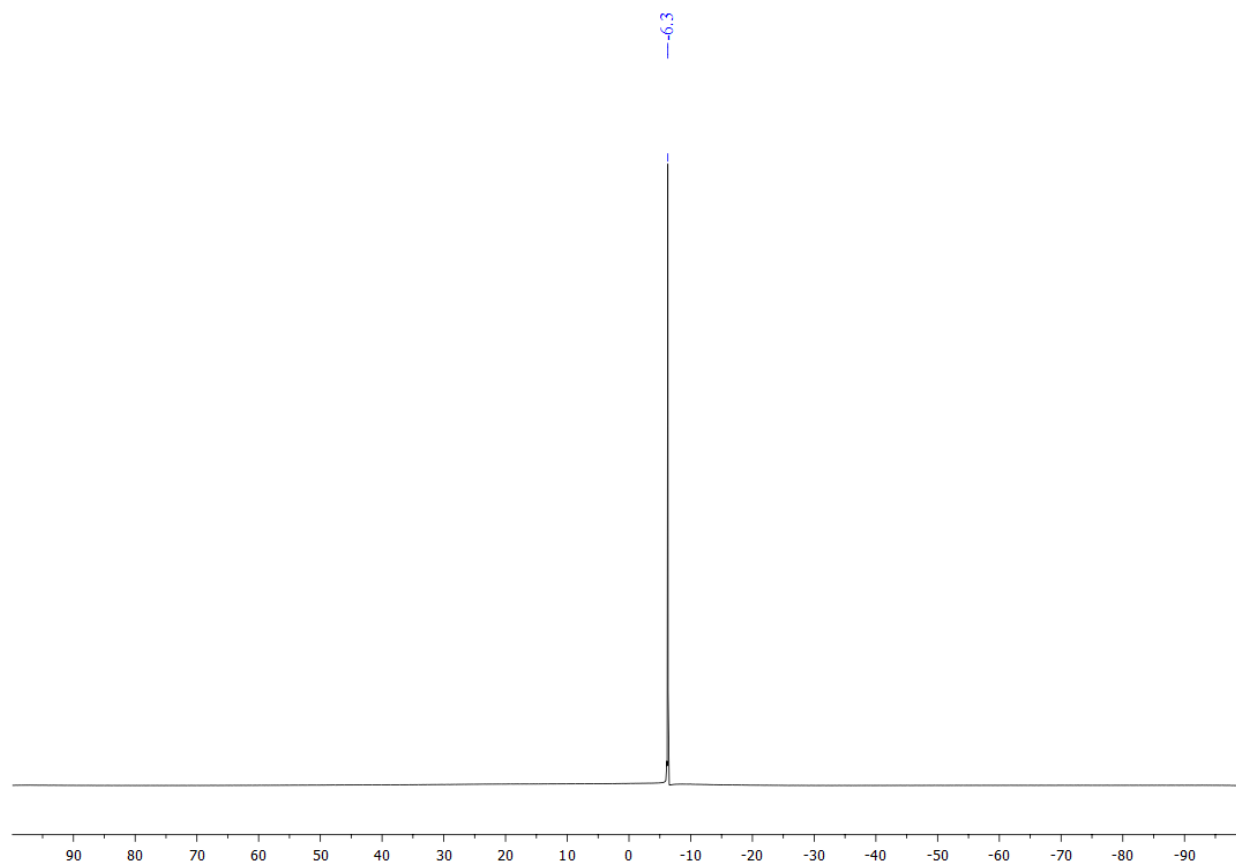

**Figure S26**  $^1\text{H}$  NMR (400 MHz, neat, 295 K) spectrum of pristine 1 M  $\text{NaBPh}_4$  in EC:DEC (1:1 v/v).

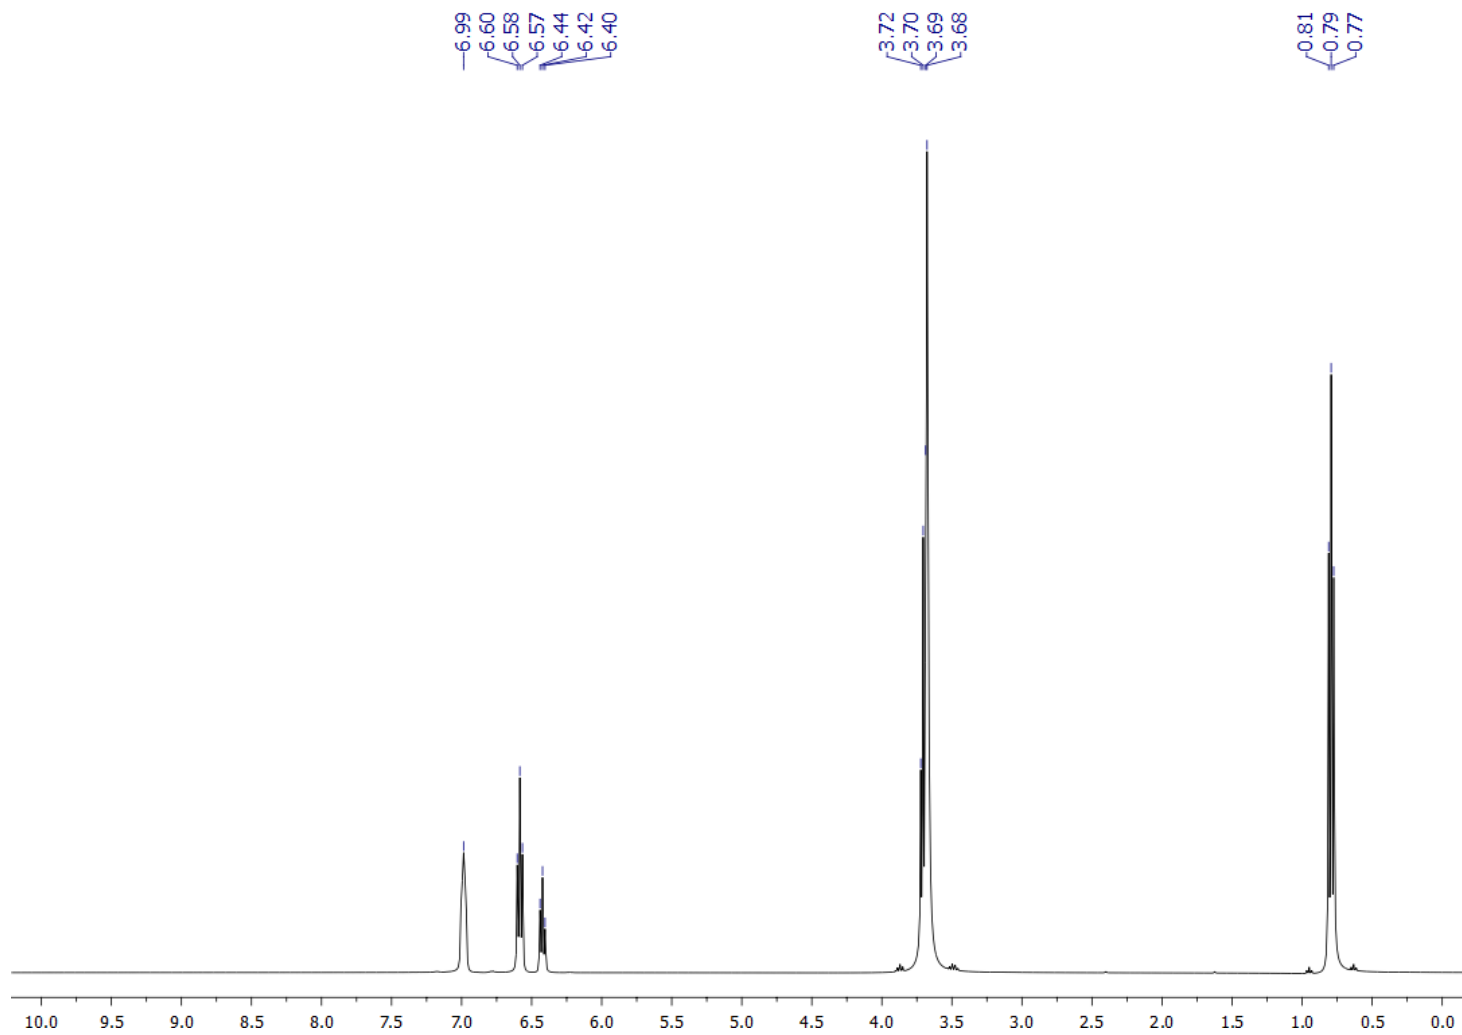

**Figure S27**  $^{11}\text{B}$  NMR (160 MHz,  $\text{CDCl}_3$ , 295 K) spectrum of pristine 1 M  $\text{NaBPh}_4$  in EC:DEC (1:1 v/v).

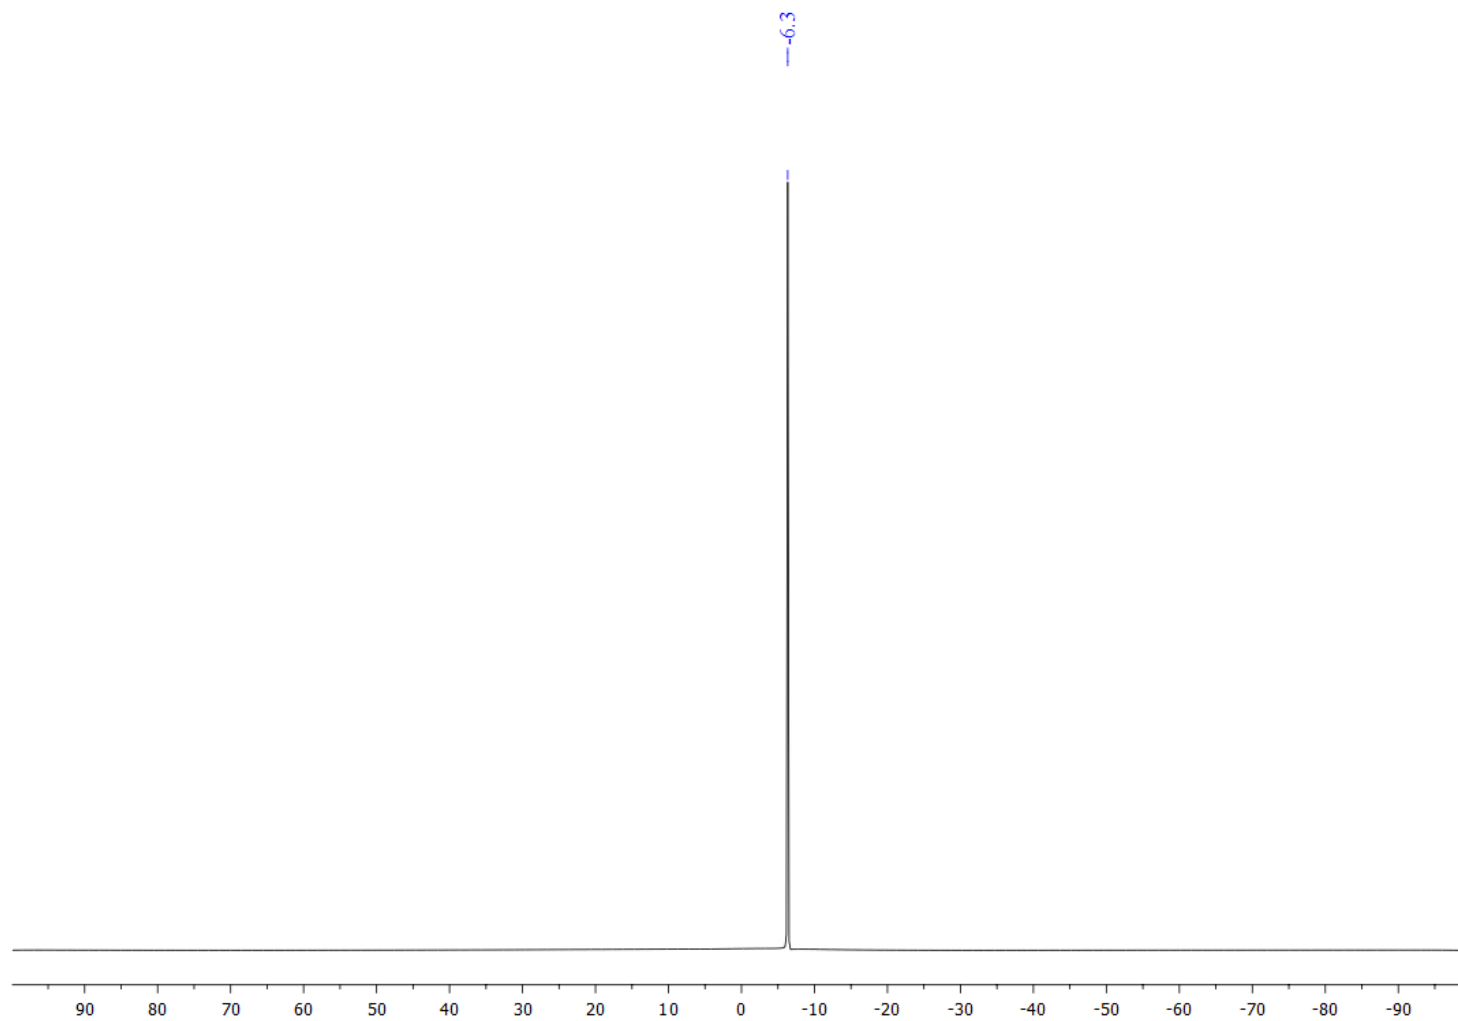

**Figure S28**  $^1\text{H}$  NMR (400 MHz, neat, 295 K) spectrum of pristine 1.5 M  $\text{NaBPh}_4$  in EC:DEC (1:1 v/v).

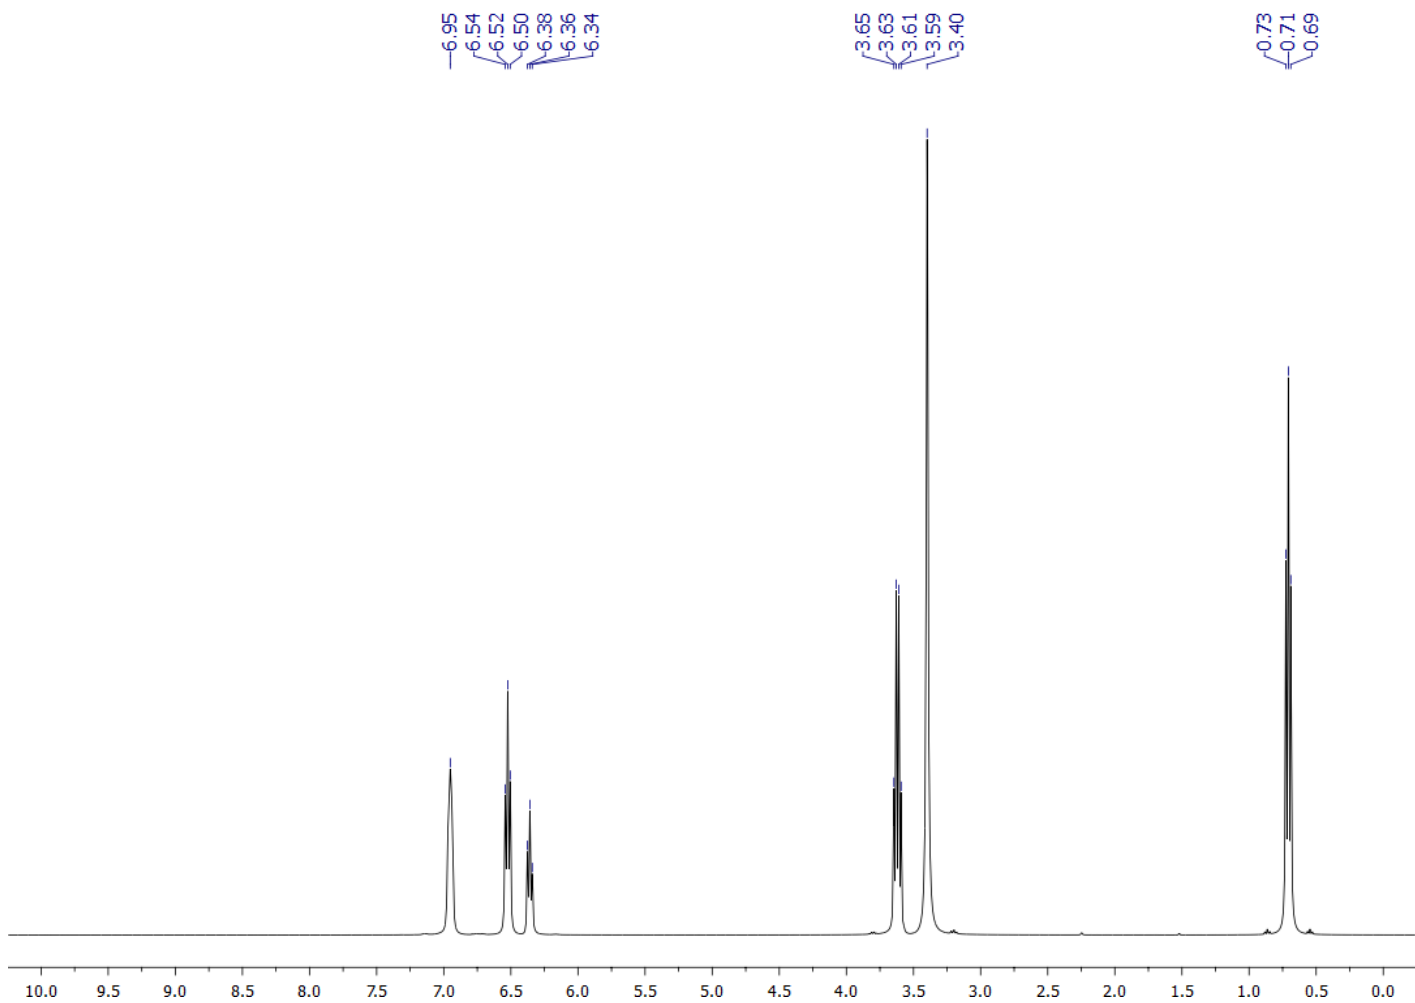

**Figure S29**  $^{11}\text{B}$  NMR (160 MHz,  $\text{CDCl}_3$ , 295 K) spectrum of pristine 1.5 M  $\text{NaBPh}_4$  in EC:DEC (1:1 v/v).

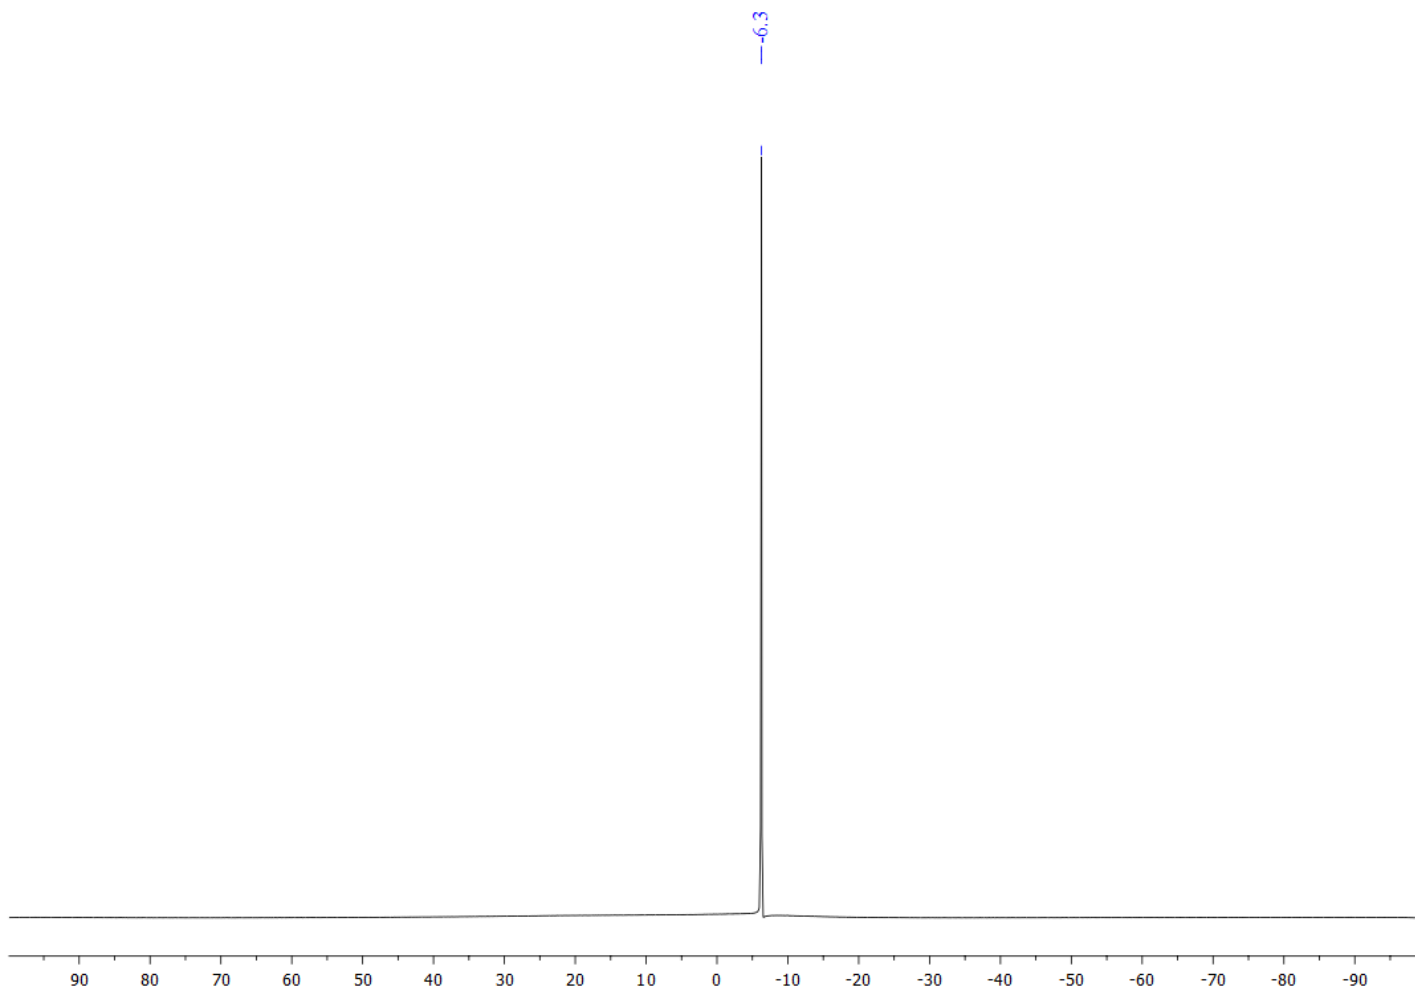

**Figure S30**  $^1\text{H}$  NMR (500 MHz,  $(\text{CD}_3)_2\text{SO}$ , 295 K) spectrum of post-cycled 0.5 M  $\text{NaBPh}_4$  in EC:DEC (1:1 v/v) cycled between 1.5–3.0 V.

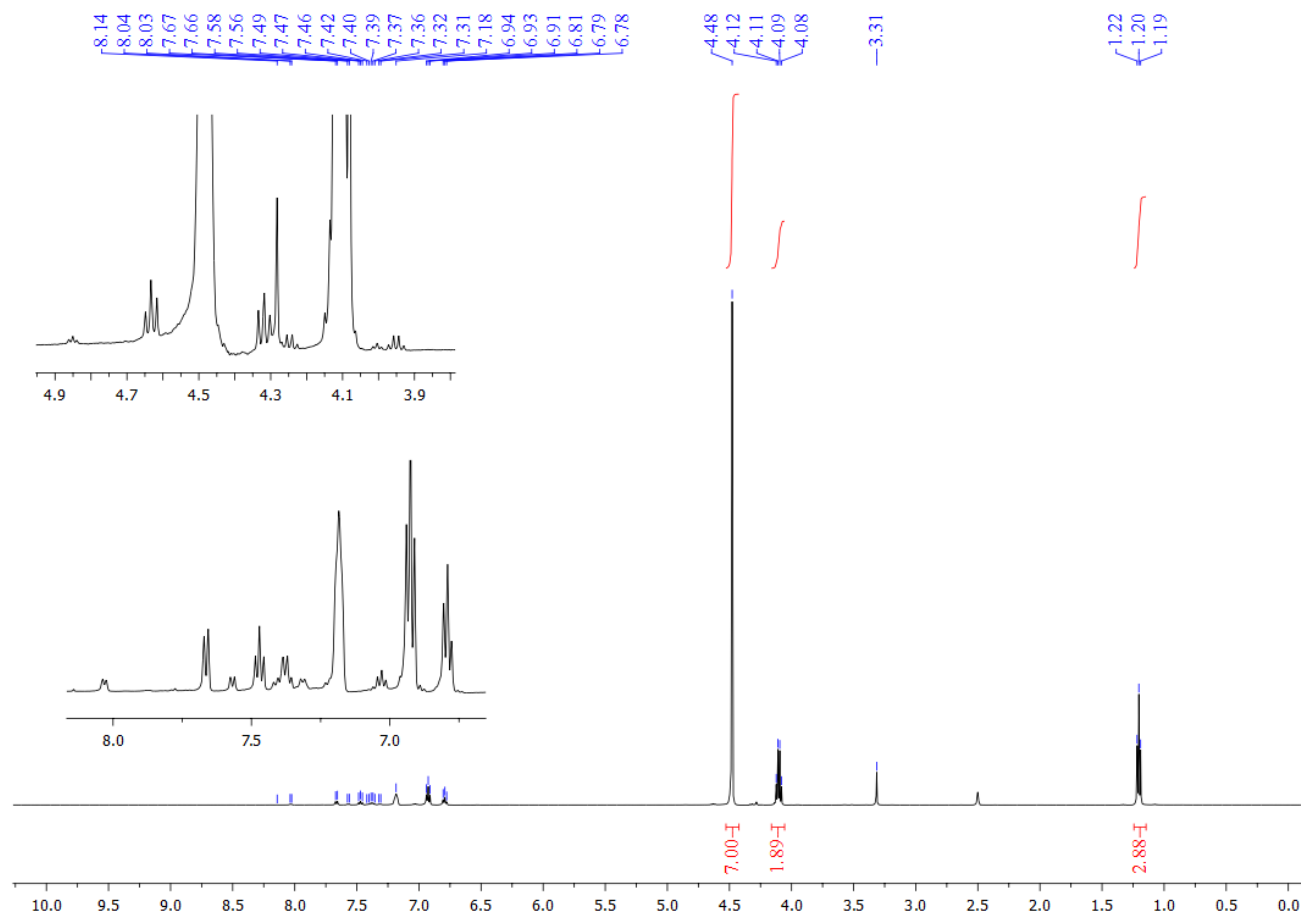

**Figure S31**  $^{11}\text{B}$  NMR (160 MHz,  $(\text{CD}_3)_2\text{SO}$ , 295 K) spectrum of post-cycled 0.5 M  $\text{NaBPh}_4$  in EC:DEC (1:1 v/v) cycled between 1.5–3.0 V.

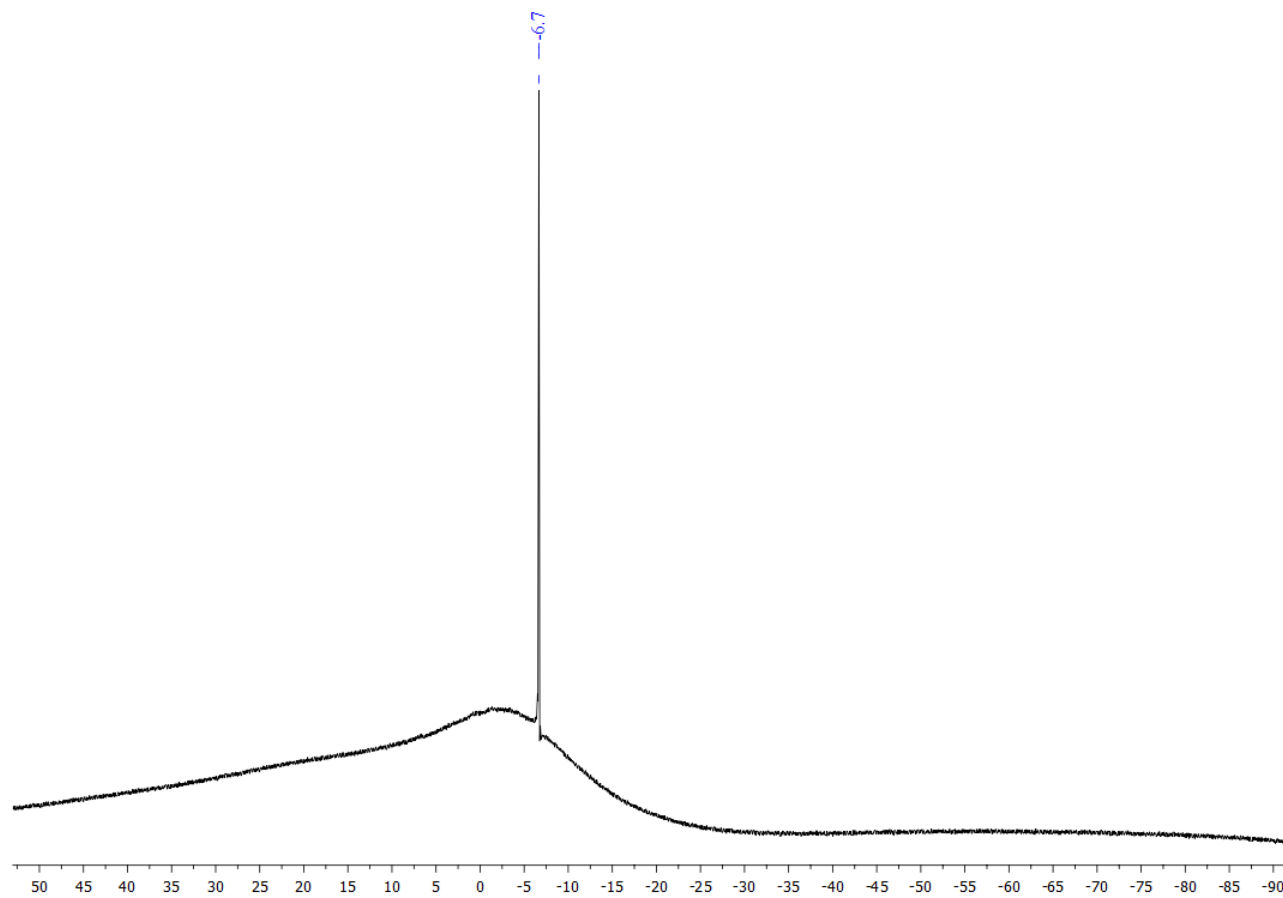

**Figure S32**  $^1\text{H}$  NMR (500 MHz,  $(\text{CD}_3)_2\text{SO}$ , 295 K) spectrum of post-cycled 0.5 M  $\text{NaBPh}_4$  in EC:DEC (1:1 v/v) cycled between 1.5–3.2 V.

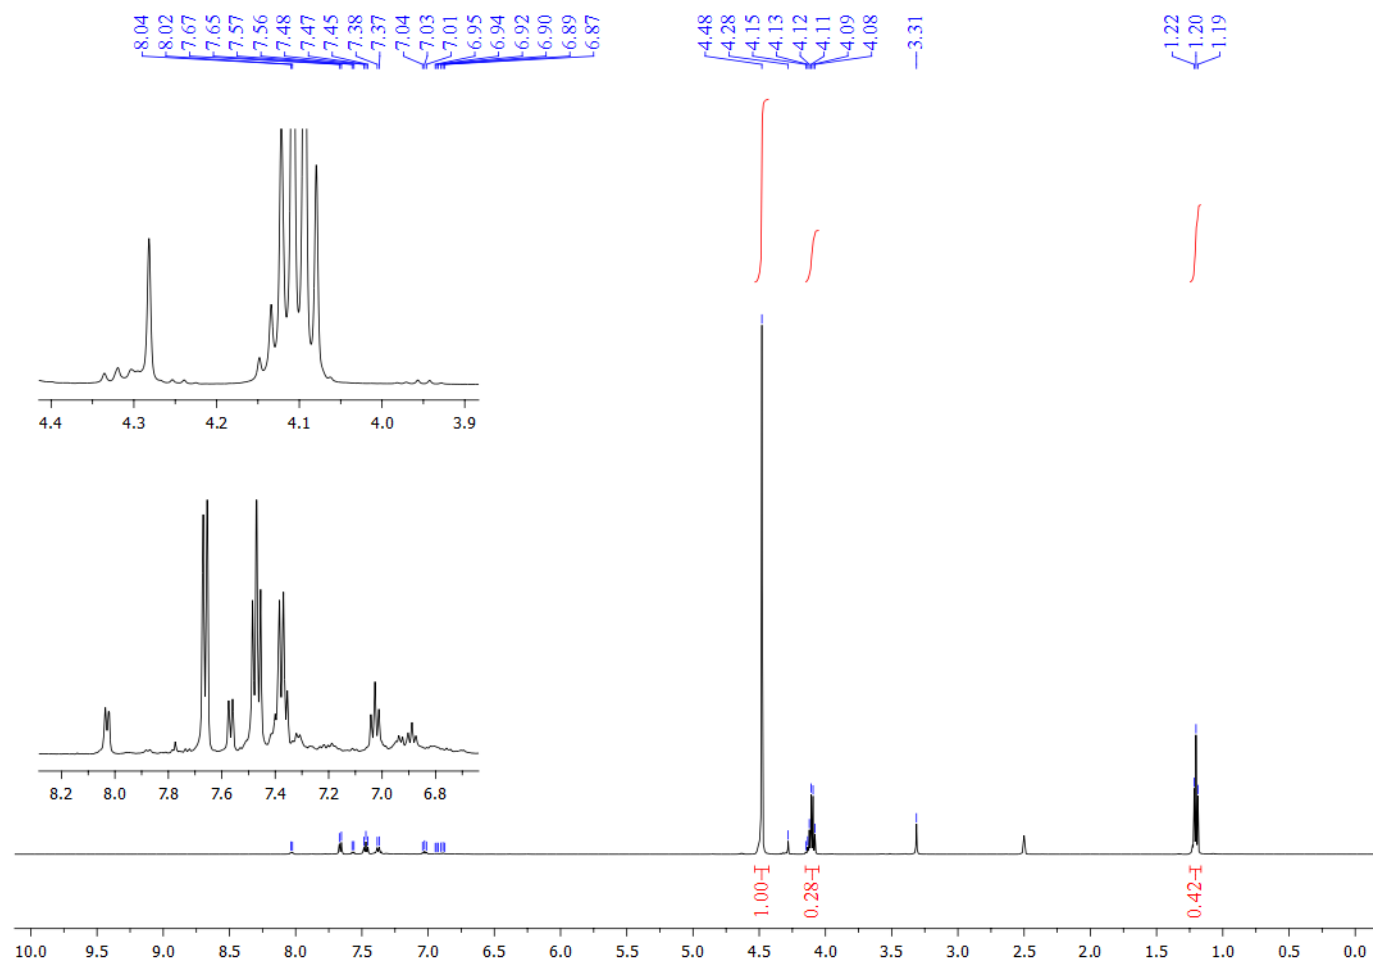

**Figure S33**  $^{11}\text{B}$  NMR (160 MHz,  $(\text{CD}_3)_2\text{SO}$ , 295 K) spectrum of post-cycled 0.5 M  $\text{NaBPh}_4$  in EC:DEC (1:1 v/v) cycled between 1.5–3.2 V.

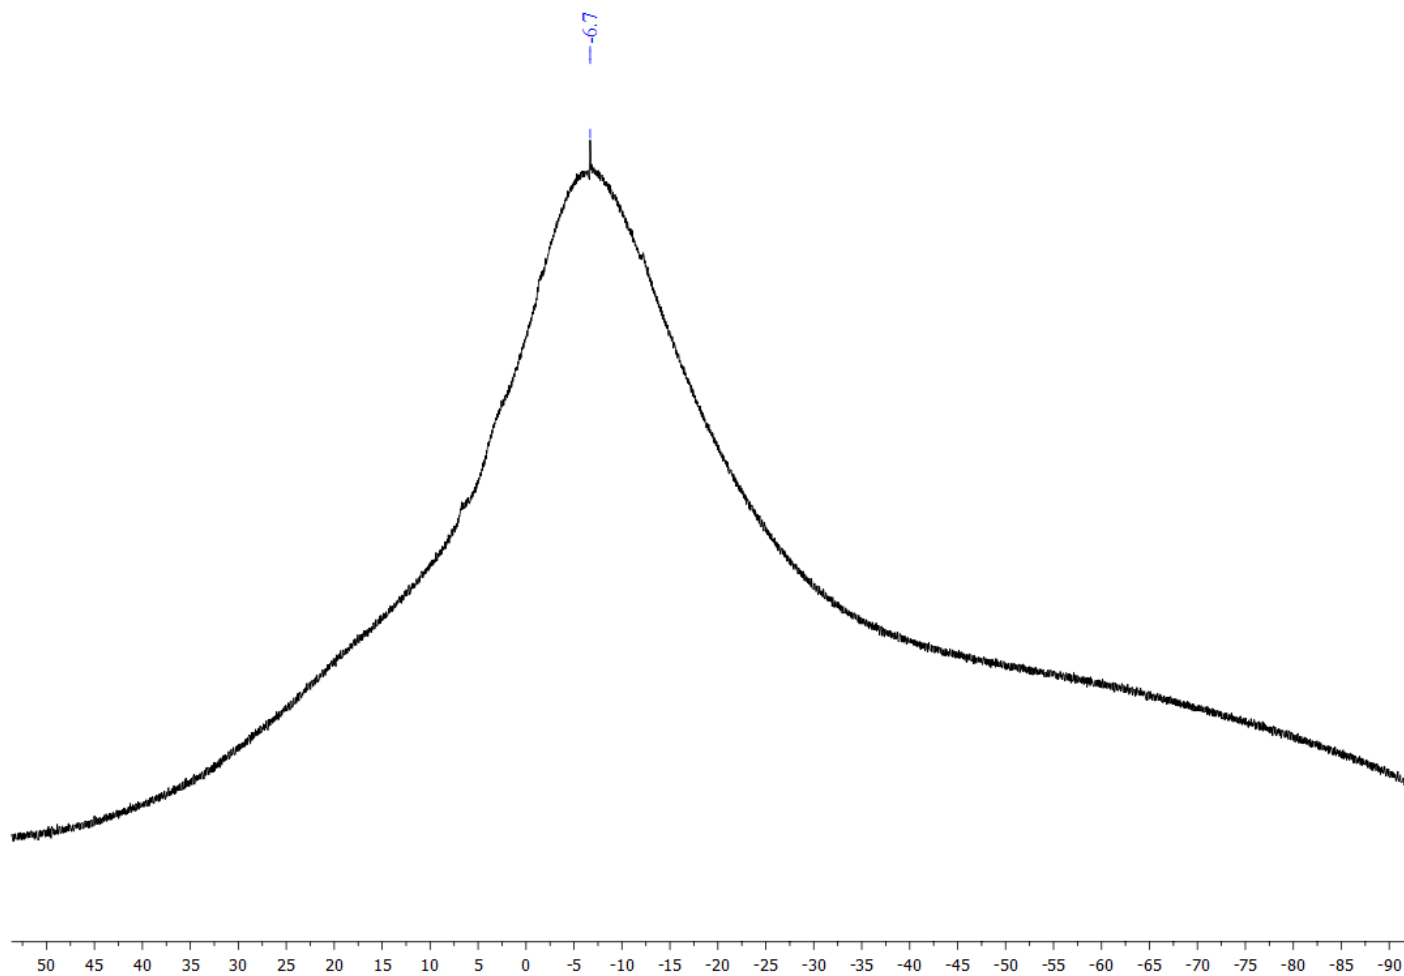

**Figure S34**  $^1\text{H}$  NMR (400 MHz,  $(\text{CD}_3)_2\text{SO}$ , 295 K) spectrum of pristine biphenyl.

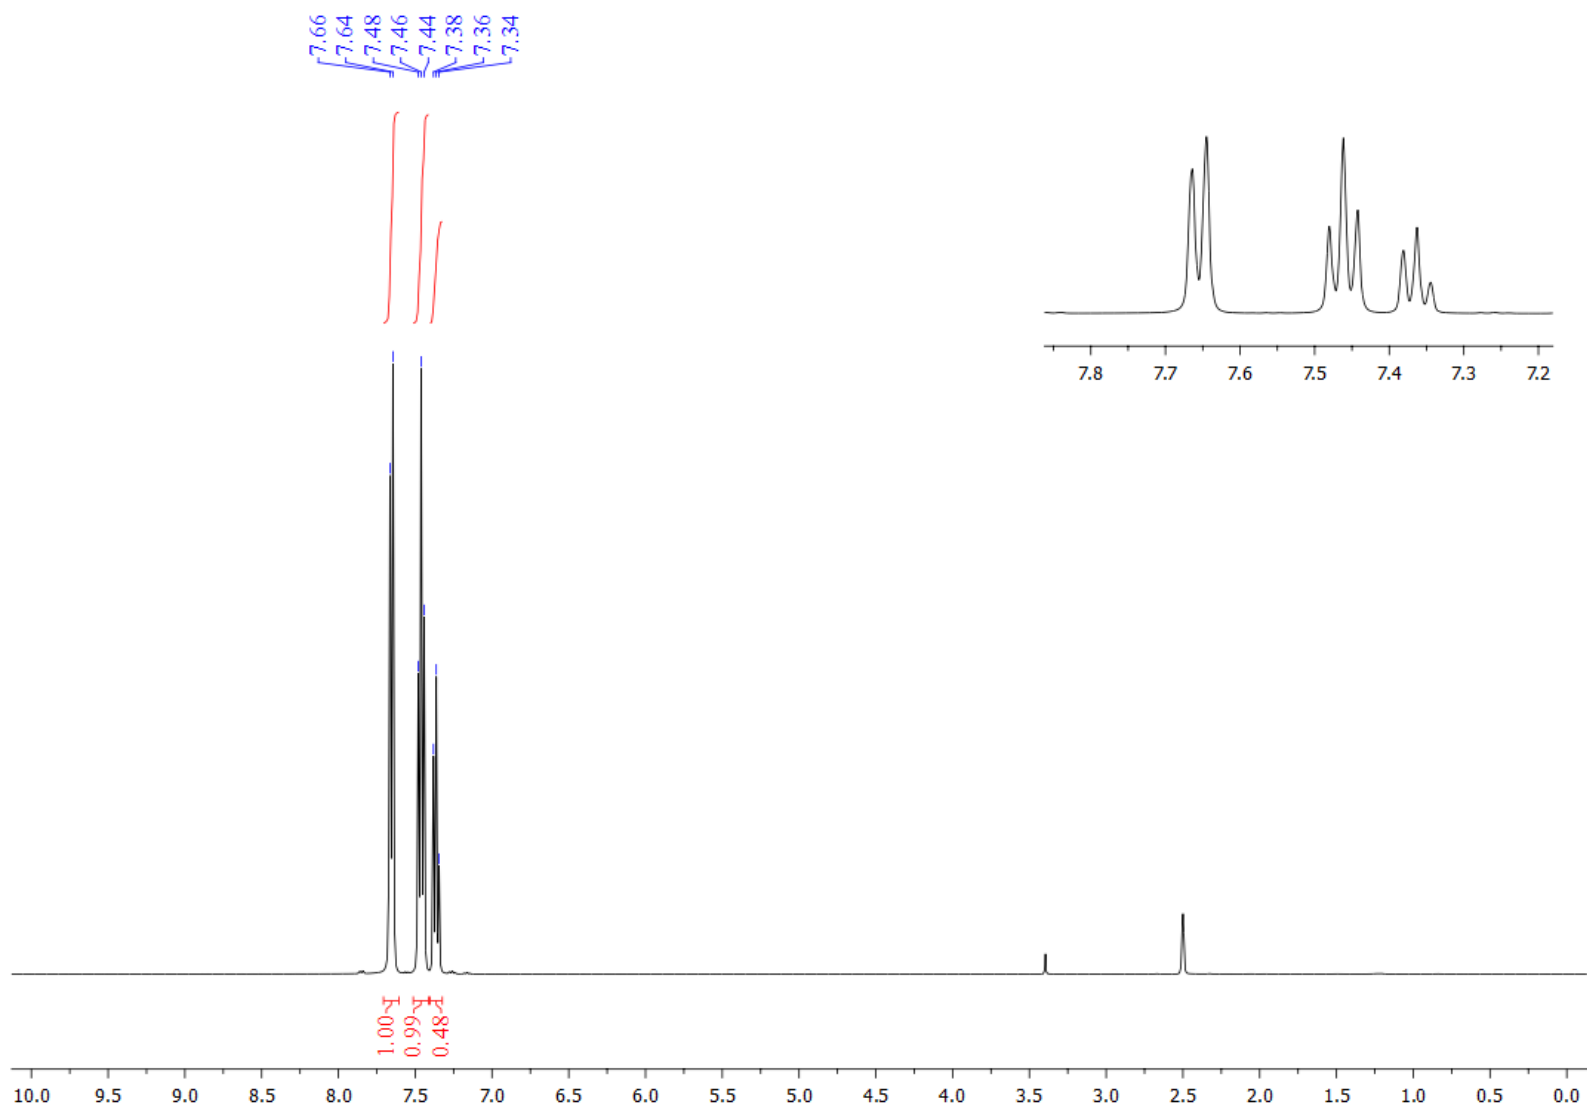

Figure S35  $^1\text{H}$  NMR (400 MHz,  $(\text{CD}_3)_2\text{SO}$ , 295 K) spectrum of pristine triphenylborane.

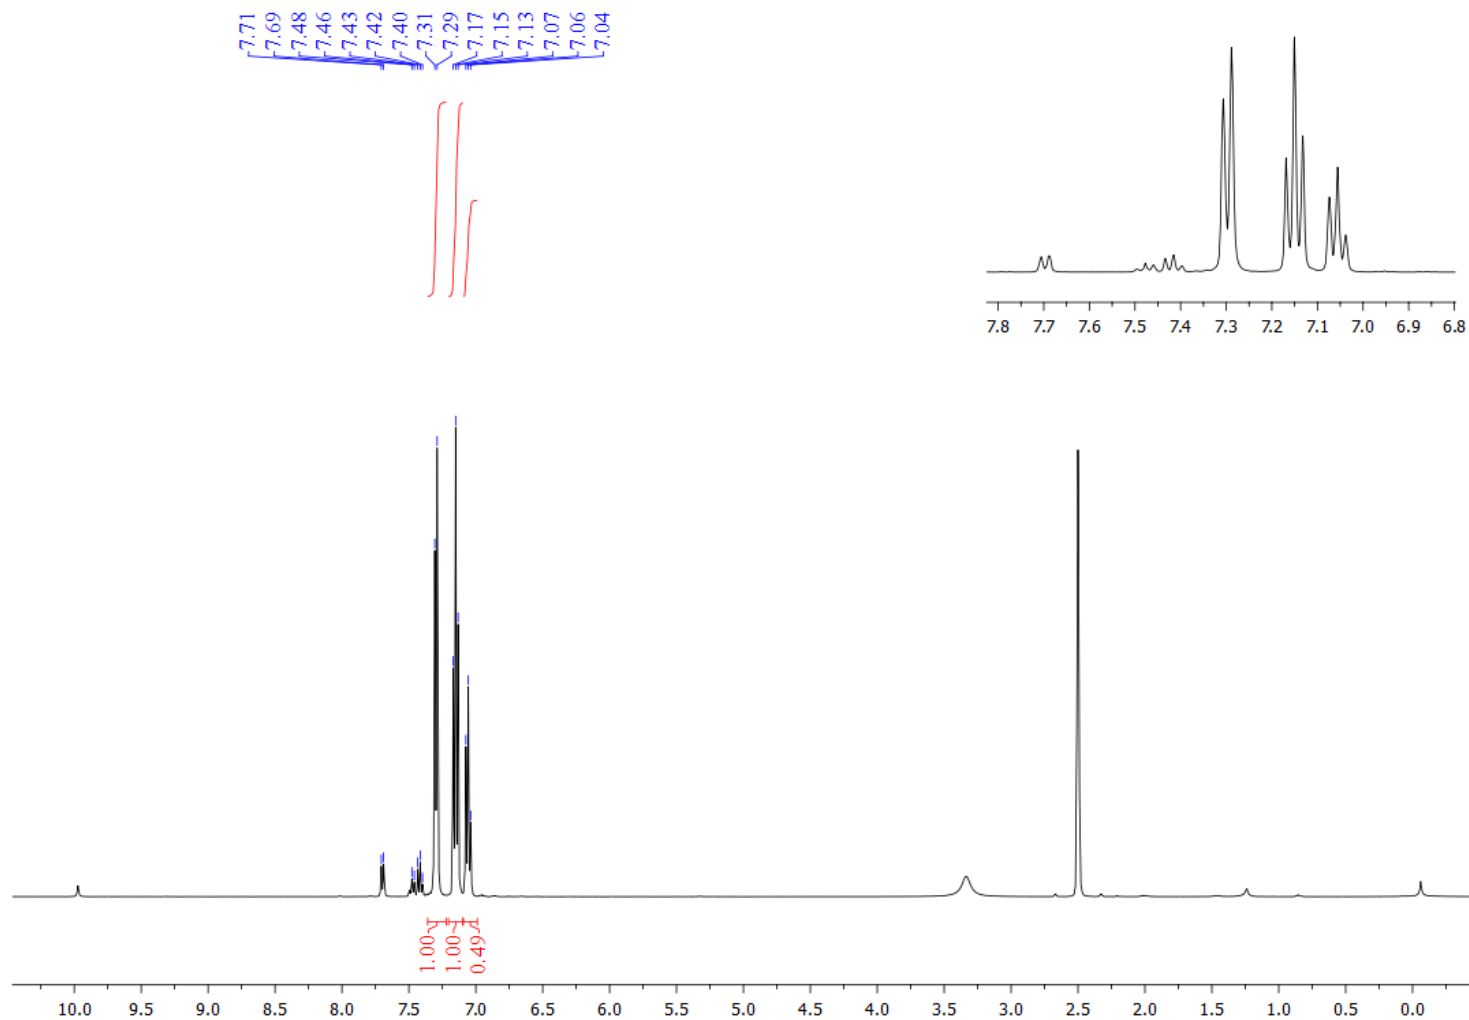

**Figure S36** Photo of NMR tubes containing post-cycled 0.5 M NaBPh<sub>4</sub> in EC:DEC electrolyte from cells cycled between 1.5–3.0 V and 1.5–3.2 V.

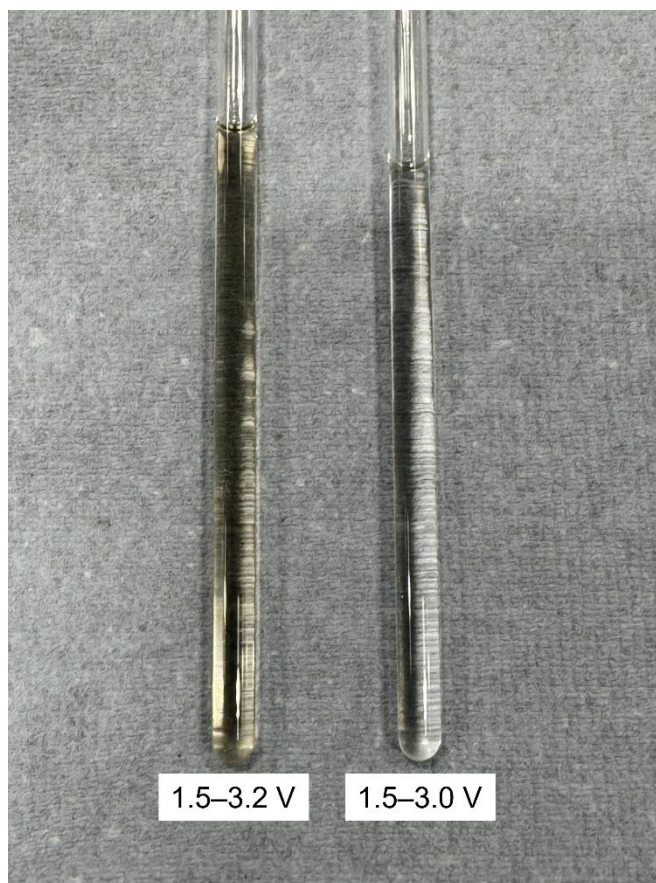

## S9 References.

- 1 D. Monti, E. Jónsson, A. Boschini, M. R. Palacín, A. Ponrouch and P. Johansson, *Phys. Chem. Chem. Phys.*, 2020, **22**, 22768–22777.
- 2 D. M. C. Ould, S. Oswald, H. E. Smith, C. A. O. Keefe, T. Song, E. Kendrick, D. S. Wright and C. P. Grey, *Chem. Commun.*, 2025, **61**, 8516–8519.
